1 **Title**

2 Migrating mesoderm cells self-organize into a dynamic meshwork structure during  
3 chick gastrulation

4

5 **Authors**

6 Yukiko Nakaya, Mitsusuke Tarama, Sohei Tasaki, Ayako Isomura, Tatsuo Shibata\*

7

8 **Affiliation**

9 Laboratory for Physical Biology, RIKEN Center for Biosystems Dynamics Research,  
10 Kobe 650-0047, Japan.

11

12 **Corresponding author**

13 Tatsuo Shibata ([tatsuo.shibata@riken.jp](mailto:tatsuo.shibata@riken.jp))

14

15 **Abstract**

16 Migration of cell populations is a fundamental process in morphogenesis and disease.  
17 The mechanisms of collective cell migration of epithelial cell populations have been  
18 well studied. It remains unclear, however, how the highly motile mesenchymal cells,  
19 which migrate extensively throughout the embryo, are connected with each other and  
20 coordinated as a collective. During gastrulation in chick embryos, the mesoderm cells,  
21 that are formed by an epithelial-to-mesenchymal transition (EMT), migrate in the 3D  
22 space between ectoderm and endoderm of the embryo. Using live imaging and  
23 quantitative analysis, such as topological data analysis (TDA), we found that the  
24 mesoderm cells undergo a novel form of collective migration, in which they form a

25 meshwork structure while moving away from the primitive streak. This meshwork is  
26 supported by N-cadherin-mediated cell-cell adhesion, which undergoes rapid  
27 reorganization. Overexpressing a mutant form of N-cadherin decreases the speed of  
28 tissue progression and the directionality of the collective cell movement, whereas the  
29 speed of individual cells remains unchanged. To investigate how this meshwork arises  
30 and how it contributes to the cell movement, we utilized an agent-based theoretical  
31 model, showing that cell elongation, cell-cell adhesion, and cell density are the key  
32 parameters for the meshwork formation. These data provide novel insights into how a  
33 supracellular structure of migrating mesenchymal cells forms and how it facilitates  
34 efficient migration during early mesoderm formation.

35

## 36 **Introduction**

37 Collective behaviors of migrating cells are fundamental in processes of morphogenesis  
38 of tissues and organ, wound healing, and tumor metastasis. Such collective cell  
39 migration is typically found in epithelial tissues, in which the motile ability can be  
40 acquired by bringing multiple cells together into one group via intercellular adhesion  
41 (1–5). On the other hand, mesenchymal cells do not exhibit stable intercellular adhesion  
42 with surrounding cells, and they can migrate as individual cells. However, even for  
43 these mesenchymal cells, collective cell migration that exploits transient cell-cell  
44 adhesion is required for the morphogenesis in living organisms (1, 6, 7). Neural crest  
45 (NC) migration is one of the most studied model systems for mesenchymal collective  
46 migration, in which cells are gathered into characteristic chains or streams within a  
47 physically restricted environment (8). In *Xenopus* embryos, cranial NC streams emerge  
48 from the interaction with neighboring tissue placode, where transient cell-cell

49 interactions called contact inhibition of locomotion confer the supracellular polarity to  
50 determine the orientation of movement as a group (9, 10). Whereas the mechanism of  
51 this streaming migration is relatively well investigated (11), it is still largely unknown  
52 how mesenchymal cells that are not tightly confined, such as those in mesoderm, move  
53 toward their destination and how their transient cell-cell adhesions contribute to it.

54 Mesoderm is a germ layer consisting of mesenchymal cells, and it forms during  
55 gastrulation. In the case of chick embryos, as the primitive streak is being formed, cells  
56 in the superficial layer (epiblast) move toward the primitive streak. Most of the  
57 mesoderm cells are formed by the convergence of these epithelial-shaped epiblast cells  
58 to the primitive streak, which subsequently undergo the epithelial-to-mesenchymal  
59 transition (EMT). These mesoderm cells ingress adopting an irregular mesenchymal  
60 morphology and acquire high motility (12–14). Then, the mesoderm cells move away  
61 from the primitive streak at various anterior-posterior positions, in the three-  
62 dimensional (3D) space between the epiblast and endoderm (Figure 1A) (movie:  
63 <https://www.sdbcore.org/object?ObjectID=358>) (12–18). Previous reports suggested  
64 that the mesoderm cells migrate at high density and their long-range migration pathway  
65 was controlled by a balance between chemo-repulsion mediated by FGF8 secreted from  
66 the primitive streak and chemo-attraction mediated by FGF4 secreted from the head-  
67 process and notochord (3, 19). It is not clear, however, whether they are essentially  
68 solitary cells following the same cues while occasionally contacting each other or  
69 whether collective effects are essential for the mesoderm migration. If the latter is the  
70 case, questions arise as to what kind of cell-cell interactions give rise to the collective  
71 property, and what spatial structure emerges beyond the single cellular scale when cells  
72 migrate collectively.

73 In this study, we investigated the cellular mechanisms underlying mesoderm cell  
74 migration in chicks. Our quantitative data analysis including large-scale cell tracking  
75 and topological data analysis (TDA) on high-resolution microscopy images showed that  
76 the mesoderm cells migrate collectively, and they are connected to each other via  
77 cadherin-mediated cell-cell adhesion and form a meshwork structure that exhibits a  
78 continual and rapid reorganization. This dynamic meshwork structure was reproduced  
79 by a theoretical model, which demonstrates that the morphology of the cells, the  
80 strength of cell-cell adhesion, and the cell density are key parameters for the meshwork  
81 formation.

82

### 83 **Results**

#### 84 **Mesoderm cells move collectively with frequent changes in their relative position**

85 We first investigated how mesoderm cells migrate in the early gastrulating stage of  
86 chick embryos. To this end, we electroporated a plasmid encoding H2B-eGFP into the  
87 mesoderm precursor cells located at the primitive streak of stage HH3 embryos (20),  
88 and then the embryos were cultured *ex vivo* for several hours (21). To follow the  
89 behavior of electroporated cells, we obtained 3D images (scan area:500 $\mu$ m x 500 $\mu$ m,  
90 scan depth:50 $\mu$ m) of the mesoderm at three different streak levels along the primitive  
91 streak, at 1 min intervals, for 2 h using an inverted two-photon microscope with 25x  
92 WMP/0.25 NA objective (Figures 1A and 1B, and Video S1). We note that at this  
93 developmental stage (HH3) the entire length of the primitive streak is less than 2mm.  
94 We also note that although the tissue scale extension along the anterior-posterior axis  
95 becomes more prominent after HH4+, the cell trajectories at this stage (HH3) reflect the

96 cell migration in the environment of mesoderm region without the tissue-scale  
97 deformation.

98 From the position of the nuclei, we reconstructed the 3D trajectories of mesoderm  
99 cells (Figure 1C and Video S1), where the x and y axes correspond to the mediolateral  
100 and anterior-posterior (AP) axes, respectively. Most of these 3D trajectories were of  
101 mesoderm cells, but there might have been a few endodermal and epiblast cells. In all  
102 three regions, the mesoderm cells exhibited a spreading behavior with maximal cell  
103 displacement in particular directions (Figures 1C, Anterior, Middle, and 1D). In the  
104 anterior and middle regions, the mesoderm cells tended to move in the anterior-lateral  
105 direction (Figures 1C Anterior, Middle and 1D). In contrast, the mesoderm cells in the  
106 posterior region tended to move toward the lateral direction (Figures 1C, Posterior and  
107 1D). These migration directions were consistent with previous reports (17, 19). Now we  
108 quantitatively investigate the migration of individual mesoderm cells and how their  
109 migration are coordinated among neighboring cells.

110 The trajectory of the individual cells showed that the mesoderm cells frequently  
111 changed their direction of motion, and some cells move even toward the primitive  
112 streak transiently (Figure 1C). The z-position of the mesoderm cells also changed  
113 frequently (Figure 1C). In fact, the distribution of the difference between the maximum  
114 and minimum z-positions of individual trajectories in 60 min showed a peak around 20  
115  $\mu\text{m}$  with a tail that extended more than 40  $\mu\text{m}$  (Figure S1A), indicating that most cells  
116 change their z-position by more than one to two cell lengths, given that the typical cell  
117 length is 10 to 20  $\mu\text{m}$ . Thus, the mesoderm cells frequently change their direction of  
118 motion in 3D.

119 We first quantitatively characterize this migration behavior of individual cells for  
120 trajectories obtained from six embryos (in total,  $6 \times 3 = 18$  samples) (see SI  
121 Methods). The mean values of individual cell speed for each sample were distributed  
122 from about 2.3 to  $3.5 \mu\text{m}/\text{min}$  (Figure 1E) (for the speed of individual cell, see Figure  
123 S1B). The directionality defined by the ratio of the start-to-end distance to the total path  
124 length measures how persistent the trajectories are (SI Methods). The directionality for  
125 the trajectories of 20 min length in 18 samples was smaller than unity and was  
126 distributed from about 0.45 to 0.7 (Figure 1F). We then performed a mean squared  
127 displacement (MSD) analysis to evaluate the randomness of the individual mesoderm  
128 migration (SI Methods). The MSD were proportional to  $t^\alpha$ , where  $\alpha$  was distributed  
129 from about 1.5 to 1.75 (Figure. 1G and H). This result means that the mesoderm cell  
130 motion in all regions is in the regime between random walk ( $\alpha = 1$ ) and ballistic motion  
131 ( $\alpha = 2$ ) (22). We also confirmed that the MSD exponent and the directionality showed  
132 a good positive correlation (Figure S1C). To further verify the persistence of the  
133 migration direction, we calculated the autocorrelation function (ACF) of the velocity of  
134 individual cells (Figure S1D). The ACF indicated that the correlation decreased below  
135 0.5 in 2 min for all 18 samples, indicating that the migration direction shows random  
136 fluctuations. For longer time scale, the ACF gradually decreased, but did not converge  
137 to zero, indicating that the motion was biased slightly to a particular direction in each  
138 region. Thus, the motion of mesoderm cell is considered as a biased random walk. We  
139 note that these migration characteristics were not significantly different between the  
140 three regions, anterior, middle, and posterior.

141 We next elucidate the coordination of cell migrations among neighboring cells by  
142 analyzing the collective order of the mesoderm cell motions. To this end, we measured

143 the polar order parameter  $\varphi$  of the direction of cell motion that quantifies the  
144 instantaneous directional alignment among cells (SI Methods) (23). When all cells  
145 move in the same direction,  $\varphi$  is unity, whereas  $\varphi$  is zero when the direction of the  
146 cell migration is completely random. First, we calculated  $\varphi$  for cells within a circular  
147 region of radius  $25 \mu\text{m}$  in the xy-coordinate. The value of  $\varphi$  was distributed from 0.5  
148 to 0.75 with a mean value of 0.64, indicating that the migration direction is well aligned  
149 among the neighboring cells (Figure 1I), despite of the randomness in the individual cell  
150 motion. To investigate how far the cell migration direction is aligned, we measured the  
151 polar order parameters for different radius of the measurement circle. As the radius of  
152 the measurement circle increases, the polar order parameter decreases exponentially  
153 with a characteristic decay length of  $57 \mu\text{m}$ , beyond which the average of  $\varphi$  is less  
154 than 0.5. This result indicates that the mesoderm cells within a length scale of about  
155  $60 \mu\text{m}$  migrate collectively. In the longer length scale, the migration of the mesoderm  
156 cells becomes less coordinated due to the fluctuation in the migration direction as the  
157 ACF of the velocity indicates.

158 To study whether the mesoderm cells within this characteristic length move together,  
159 we measured the mean squared relative distance (MSRD) (SI Methods), which  
160 quantifies the temporal change of the relative distance between two cells. The MSRD  
161 curve increases with time, but there is a threshold time about 10 min (Figure 1J) beyond  
162 which the increase of the MSRD slows down. In this time scale, the two cells initially in  
163 contact move away from each other to about  $25 \mu\text{m}$ . Beyond the threshold time, the  
164 MSRD increases linearly in time. This indicates that the migrating mesoderm cells do  
165 not form a tight cluster, changing their relative positions frequently. It also suggests that

166 there is sufficient extracellular space where the cells can easily change their relative  
167 positions in the mesoderm tissue.

168 We finally measured the progression speed of mesoderm for 18 samples, which was  
169 obtained as the time average of the average velocity of cells in small regions ( $50\ \mu\text{m} \times$   
170  $50\ \mu\text{m}$ ) (Figure 1D color code). The mean of the progression speed was distributed from  
171 about  $0.5$  to  $2\ \mu\text{m}/\text{min}$  (Figure 1E), which was almost the half of the individual cells  
172 speed (Figures 1E and S1B). This difference can be explained by considering the  
173 randomness of cell migrations and the value of the polar order parameter of this length  
174 scale.

175

#### 176 **Mesoderm cells form meshwork structure**

177 If there is sufficient extracellular space for cells to change their relative position  
178 frequently, how do they distribute in 3D space between the epiblast and the endoderm?  
179 To explore this question, we prepared 3D reconstructed images of the mesoderm tissue  
180 at the mid-streak level in HH4 embryos (Figure 2A). From the projected image on the  
181 xy plane (Figure 2B, z-projection), we found no clear pattern in the distribution of cells  
182 in the primitive streak (dense region of nuclei stained with DAPI) and the mesoderm  
183 next to the streak, consistent with previous reports based on scanning electron  
184 microscopy (SEM) analysis (24, 25). However, when we looked closely at the  
185 horizontal sections of  $1.5\ \mu\text{m}$  thickness, we realized that cells were not distributed  
186 uniformly but there were many holes without cells (Figure 2B, z-section and Video S2).  
187 To see how these holes are formed, we visualized the cell-cell adhesion by staining for  
188 N-cadherin. It revealed that the mesoderm cells were connected via N-cadherin  
189 mediated cell-cell adhesion and surrounded the holes, which led to formation of a



190 meshwork structure within the tissue (Figures 2B, 2C and 2D, and Video S2). Thus, in  
191 contrast to previous reports (18) that suggested that the mesoderm is densely packed  
192 with migrating cells, we found a meshwork structure of collectively migrating  
193 mesoderm cells. The holes in the meshwork structure were surrounded by about 10 to  
194 20 cells (Figure 2C). The transverse section of the embryo revealed that the holes  
195 extended in the z-direction between the epiblast and the endoderm layers (Figure S2A).

196 To characterize the meshwork structure of the mesoderm quantitatively, we applied  
197 persistent homology analysis (SI Methods). Persistent homology is a tool that has been  
198 developed recently in applied mathematics to quantitatively characterize the topological  
199 structure in disordered systems (26–28). In persistent homology analysis, the holes are  
200 characterized by the two quantities called birth and death times, and they are visualized  
201 by points in persistence diagram (PD) where the coordinates are given by the birth and  
202 death times (Figure 2F). The difference between the death time and the birth time is  
203 called lifetime, which becomes large for a reliable topological structure. Note that in the  
204 persistent homology on binary images, the birth and death times, and thus the lifetime,  
205 are measured in the unit of pixels. We performed persistent homology analysis by using  
206 a software named HomCloud (27) and applying it to binarized images of the mesoderm  
207 at three different z levels. The PDs in Figure 2F show the results correspond to the  
208 images in Figure 2E. The points with large lifetime were distributed around the death  
209 time  $\approx 0$  as a branch extended away from the diagonal line (Figures 2F and S2B),  
210 which we call *hole branch* in this paper. Each point in this hole branch corresponded to  
211 a clear hole in the binary image (Figure S2B). To characterize the size of the holes  
212 quantitatively, we calculated the radius from the birth time of a hole in the hole branch  
213 (Figure 2F, see also SI Methods), which was estimated on average as 17  $\mu\text{m}$ , 15  $\mu\text{m}$ ,

214 and 12  $\mu\text{m}$  for the upper, middle and lower layers, respectively (Figure 2G). Thus, the  
215 diameter of hole is almost comparable to the characteristic length scale of collective  
216 migration measured in the previous subsection ( $\sim 60 \mu\text{m}$ ). To conclude, these results  
217 indicate that the mesoderm is extended as a loose layer of cells, and the characteristic  
218 meshwork structure is formed by cells connected by N-cadherin-mediated cell adhesion,  
219 which may lead to their collective migration.

220

### 221 **Meshwork structure is dynamic with the emergence and collapse of holes**

222 To examine whether the meshwork structure was also observed in living embryos, we  
223 next performed live imaging of transgenic chicken embryos that ubiquitously express  
224 cytoplasmic GFP (29) to visualize the migration of the mesoderm cells and how they  
225 interact with each other (Figure 3A). We again found that cells away from the primitive  
226 streak formed meshwork structures, as seen in the optical thin section of middle layer in  
227 the mesoderm at the mid-streak level (Figures 3A, S3A, and Videos S3 and S4).  
228 Interestingly, the holes in the meshwork were not static but gradually moving anterior-  
229 laterally (Figures 3A, S3B, and S3C, and Videos S3 and S4). We also notice that a cell  
230 of one hole migrates and participates in another hole as time passes. (Figure 3A and  
231 Videos S3 and S4).

232 To confirm this dynamic meshwork structure is the same structure as those found in  
233 the fixed embryos in the previous subsection, we applied persistent homology analysis  
234 to the snapshots of the time-lapse movie (Figure 3A). The PDs at different time points  
235 (0, 12, and 24 min) showed the hole branch of the points with large lifetime, which was  
236 comparable to the PDs obtained for the fixed embryo (Figures 2F and 3B). From this,  
237 we conclude that the meshwork structure found in the living embryo is the same

238 structure as those found in the fixed embryos. The radius of the holes was on average  
239 about 13  $\mu\text{m}$ , which showed no systematic change during the observation over 24 min.  
240 (Figure 3C).

241 Finally, we investigate how the meshwork structure changes in time. The advanced  
242 inverse analysis enables us to detect the region of the hole in the original binary image,  
243 which corresponds to each point in PD (SI Methods and Figure S3D). To visualize the  
244 time-evolution of the holes, we plotted the region of some holes obtained by the  
245 advanced inverse analysis in x-y-t coordinates over 24 min (Figure 3D). The holes  
246 underwent emergence and collapse, and they also split and merged occasionally, while  
247 moving gradually in the anterior-lateral direction (Figures 3D, S3B and S3C).

248 These results implied that the mesoderm cells are only transiently connected to each  
249 other and can easily change their partners. Thus, the meshwork structure is dynamic in  
250 the sense that cells that consists of the holes are replaced over time while the mesoderm  
251 cells migrate away from the primitive streak. Since the length scales of the polar order  
252 of the collective migration and the size of the holes of the meshwork are comparable,  
253 we speculate that the frequent rearrangement of the cell-cell contact is a reason why the  
254 collective order of the mesoderm cells decays in the long length scale (Figures 1I).

255

## 256 **Cell-cell adhesion is important for collective cell migration during mesoderm** 257 **formation**

258 Previous studies based on scanning and transmission electron microscopy  
259 observations have reported that the space between the epiblast and endoderm in early  
260 chick embryos, where the mesoderm cells migrate, is filled with water-soluble  
261 components such as hydrated glycosaminoglycans, in particular hyaluronic acid, and

262 contains little extracellular matrix that can provide a scaffold for cell migration (30–32).  
263 This suggests that the mesoderm cells rely on cell-cell adhesion to get traction to  
264 migrate as well as the contact to the basal lamina of either epiblast or endoderm (31,  
265 33). The formation of the meshwork and its dynamic characteristics may also rely on  
266 cell-cell adhesion. Taking these points into consideration, we questioned how much  
267 impact cell-cell adhesion has on cell migration as well as on the meshwork structure.

268 Consistent with the previous reports (12, 34, 35), during gastrulation, most mesoderm  
269 cells expressed the classical adhesion molecule N-cadherin (Figure 2A). Notably, we  
270 found that N-cadherin was localized at the cell-cell contact site between the cells in both  
271 the x-y and x-z sections (Figure 4A), meaning that the N-cadherin-mediated cell-cell  
272 adhesion is present at the cell-cell contact sites between upper and lower cells as well as  
273 at the horizontal cell-cell contact site. This implies that N-cadherin-mediated cell-cell  
274 adhesion plays fundamental role in the formation of the meshwork structure and the  
275 collective migration. To test this idea, we studied the effect of reducing the intercellular  
276 adhesion of mesoderm cells (Nieman et al., 1999; Ozawa, 2015; Ozawa and Kobayashi,  
277 2014). To this end, we generated a deletion mutant of N-cadherin (N-cad-M) which  
278 lacks the extracellular (EC) domain that is responsible for adhesive activity (36–38). In  
279 addition, H2B-mCherry was flanked on its 3'-side of the 2A peptide to make the N-cad-  
280 M expressing cells detectable (Figure 4B). We over-expressed N-cad-M with H2B-  
281 mCherry in the mesoderm cells.

282 To ensure that the endogenous N-cadherin was disappeared from the membrane, we  
283 used an N-cadherin antibody reactive against the EC domain, which can detect only  
284 endogenous N-cadherin. Immunostaining with this antibody showed that the  
285 endogenous N-cadherin accumulated in the cytoplasm and its expression was

286 disappeared from the membrane of the mutant mesoderm cells (Figure 4C left, cells  
287 with nuclei labelled in red). Similarly, endogenous expression of P-cadherin was  
288 affected, which was also mainly detected in the cytoplasm of mutant cells (Figure 4C  
289 right, cells with nuclei labelled in red). From these results, we suppose that the  
290 preferential localization of large amounts of N-cad-M to the plasma membrane  
291 disrupted the membrane localization of endogenous cadherins, which effectively  
292 attenuates cadherin-mediated cell-cell adhesion. Indeed, the cells expressing N-cad-M  
293 were excluded from the meshwork of the control cells (Figure 4D). In addition, the  
294 mutant cells were less elongated and exhibited more rounded shape (Figures 4C and  
295 4D).

296 Using this mutant form of N-cadherin, we performed live imaging to investigate the  
297 effect of the cell-cell adhesion on the mesoderm cell migration. To compare with the  
298 control cells, we electroporated the N-cad-M construct into the mesoderm cells on one  
299 side of the primitive streak, and we introduced a plasmid expressing H2B-eGFP to the  
300 cells on the other side to trace them as control cells (Figures 4B and 4E, Video S5). We  
301 performed this analysis for five embryos, each of which contains a lot of cells (see  
302 Figure 4E-K and Figure S4). We found that the cells expressing N-cadherin mutant  
303 exhibited meandering motion with more frequent changes in migration direction than the  
304 control cells (Figure 4E, Video S5), although the migration speed along the trajectory  
305 was not statistically different between them (Figures 4F and S4A). This is confirmed by  
306 the significant reduction of the directionality (Figures 4G and S4B) and the smaller  
307 exponent of the MSD for the mutant cells (Figure 4H). In addition, the progression  
308 speed of mutant cells was lower than that of the control cells for each embryo (N=5)  
309 (Figure 4I and S4C), indicating that the progression of mesoderm tissue became slower

310 when the cell-cell adhesion was attenuated. These results show that the cell-cell  
311 adhesion mediated by N-cadherin plays an important role in the tissue progression and  
312 the directionality of the mesoderm cell migration.

313 We next investigate the impact of cell-cell adhesion on the collective migration of the  
314 mesoderm cells. The polar order parameter  $\varphi(t)$  on the mutant side was smaller than  
315 that on the control side in three embryos out of five (Figure 4J and S4D), suggesting  
316 that the alignment of the cell migration direction is controlled by cell-cell adhesion. To  
317 see the persistence of the direction of collective migration, we measured its auto-  
318 correlation function (ACF) (SI Methods). The ACF of the direction of collective  
319 migration for the mutant cells decayed faster than that of the control cells in all five  
320 embryos (Figures 4K and S4E), indicating that the mutant cells changed the direction of  
321 collective migration more frequently than the control cell did. These results indicate that  
322 the cell-cell adhesion maintains the collective migration of the mesoderm cells and the  
323 persistence of its direction.

324 To understand the difference in the properties of collective migration of the  
325 mesoderm cells, we carefully observed the time-evolution of the intercellular contact.  
326 The time lapse images showed that the control cells elongate their cell bodies and  
327 contact with each other via protrusions (Figure S5A). These cells were in contact for  
328 more than a few tens of minutes, and the longest contact duration lasted for more than  
329 one hour (No.1 and No.2 pair in Figure S5A upper panels, Video 6). In contrast, the  
330 mutant cells did not maintain their cell-cell contacts upon collision with other cells for  
331 more than 20 minutes. (See No.1 cell in Figure S5A bottom panels, Video 6). Thus, we  
332 speculate that the decrease in the contact time of the mutant mesoderm cells makes their  
333 motion random and the direction of the collective migration change frequently.

334 Taken together, the comparison of the migration characteristics between the control  
335 and N-cadherin mutant cells showed that the intercellular adhesion promotes the  
336 directionality of the individual mesoderm cells, their collective migration, and the tissue  
337 progression speed of the mesoderm (Figure 4F–K). We also found that the mutant cells  
338 were more rounded than the control cells and were excluded from the meshwork  
339 structure formed by the control cells (Figure 4D). We therefore hypothesize that cell-  
340 cell adhesion is one of the key factors for the formation of the meshwork structure.  
341 Unfortunately, for technical reasons, it was difficult to introduce N-cad-M into all  
342 mesoderm cells to see if tissues composed only of N-cad-M cells fail to form a  
343 meshwork structure. Therefore, we next tested our hypothesis by developing an agent-  
344 based theoretical model.

345

#### 346 **Theoretical model to investigate the formation of meshwork structure**

347 From the experiment using the mutant form of N-cadherin, we hypothesized that the  
348 cell-cell adhesion is one of the key factors for the meshwork structure formation. To  
349 understand how the dynamic meshwork structure of mesoderm cells emerges and how it  
350 is influenced by the cellular and intercellular properties, we develop an agent-based  
351 theoretical model. To this end, we modeled a cell by a rod-shape particle that interacts  
352 with others by short-range attraction with a repulsive core (SI Methods). To focus on  
353 the essential aspect of the meshwork formation without complication, we will consider a  
354 model in two-dimensional space. We note that previous theoretical studies reported that  
355 elongated cells with attractive interaction can reproduce the formation of angiogenic  
356 network structure (39, 40).

357 To start with, we studied the steady-state spatial distribution of agents, starting from  
358 the initial state where the agents were randomly positioned in space with random  
359 orientation. We investigate the impact of the cell-cell adhesion by changing the strength  
360 of the attractive interaction. To highlight the role of the attractive interaction, we kept  
361 the aspect ratio  $\gamma = 2$  and omitted the self-propulsion of the agents. When the  
362 attractive interaction was absent or small, the agents were distributed randomly without  
363 any clear spatial pattern (Figure 5A,  $\epsilon_{\text{atr}} = 0, 0.001$ ). However, for a sufficiently large  
364 attractive interaction, the agents formed a meshwork structure (Figure 5A,  $\epsilon_{\text{atr}} =$   
365  $0.01, 0.05$ ). The birth time calculate by the persistent homology analysis, which  
366 corresponds to the radius of holes, increased with the strength of attractive interaction  
367 (Figure 5B). These results demonstrate that the cell-cell adhesion plays an important  
368 role in the meshwork structure formation.

369 Since the wild-type cells were more elongated than the mutant cells, we next studied  
370 the impact of the aspect ratio for sufficiently large attractive interaction, i.e.,  $\epsilon_{\text{atr}} =$   
371  $0.01$ . When the aspect ratio  $r$  was small, the agents were distributed randomly without  
372 any spatial pattern (Figure 5C  $r = 1.5, 1.75$ ). However, there was a threshold aspect  
373 ratio  $r^*$  ( $1.75 < r^* < 2$ ), beyond which the agents formed a meshwork structure with  
374 many holes void of agents (Figure 5C  $\gamma = 2, 2.25$ ). The persistent homology analysis  
375 distinguished this difference; at the threshold aspect ratio  $r^* \approx 1.9$ , the birth time of the  
376 holes, which corresponds to the radius of hole, showed a sharp increase (Figure 5D).  
377 This transition is evidence that the elongated shape with a large aspect ratio is important  
378 for the meshwork structure formation.

379 In summary, our *in silico* results confirmed that both attractive interaction and  
380 elongated shape with a large aspect ratio are necessary for the formation of meshwork



381 structure. Indeed, the aspect ratio of mesoderm cells was  $2.34 \pm 0.08$  ( $\pm$  SEM) (Figure  
382 S5B, control), while that of the N-cadherin mutant cells was  $1.91 \pm 0.08$  ( $\pm$  SEM)  
383 (Figure S5B, N-Cad-M). We emphasize that this experimental result is consistent with  
384 the existence of the threshold aspect ratio at  $r^* \approx 1.9$  in our *in silico* result (Figure  
385 5D).

386

### 387 **Mechanism of meshwork formation**

388 To understand the mechanism of the formation of meshwork structure, we focused on  
389 the small aggregates of agents that were found when the agent density was low. Since  
390 the results were quantitatively clearer for a high aspect ratio, we first set the agent  
391 aspect ratio as  $r = 4$ . When the density of agent is low, many small aggregates are  
392 formed due to the short-range attractive interaction (Figure 5E  $\rho = 0.25$ ). Most of the  
393 aggregates have an elongated shape with aspect ratio much greater than unity (Figure 5F  
394 left, color). Inside the aggregates, the agents tend to align their direction of the shape  
395 elongation. Such a directional order is called nematic order. The direction of the  
396 nematic order in each aggregate is correlated with that of the aggregate elongation  
397 (Figure 5F left and the red curve in Figure 5F right), indicating that the aggregates tend  
398 to elongate in the direction of the nematic order. When the agent density increases  
399 beyond a threshold value, a meshwork structure is formed (figure 5E  $\rho = 0.6$ ). Thus, a  
400 scenario for the formation of the meshwork structure is as follows. The attractive  
401 interaction between agents induces the formation of aggregates, in which the agents  
402 align their orientation nematically. The positional and directional fluctuations of the  
403 agents deform the shape of aggregates in a way that they elongate in the direction of the  
404 nematic order. As the agent density increases, such elongated aggregates further extend

405 and are eventually connected to each other, leading to the formation of the meshwork  
406 structure due to the randomness of the aggregate elongation direction. When the aspect  
407 ratio  $r$  is reduced to  $r = 2$ , the correlation of the orientations of the nematic order and  
408 the aggregate elongation decreases (the blue curve in Figure 5F right). As the agent  
409 density increases, however, the correlation increases, indicating that the same scenario  
410 applies to this case ( $r = 2$ ). In contrast, when  $r = 1.75 < r^*$ , the correlation decreases  
411 as agent density increases, suggesting that the scenario does not hold, resulting in the  
412 random distribution of agents without the meshwork structure formation.

413

#### 414 **Dynamic meshwork formation with the supply of agents**

415 During gastrulation, mesoderm cells are continuously supplied and move away from  
416 the primitive streak (Figure 1A). To mimic this situation, we modified the simulation  
417 condition to the case where the agents are supplied constantly at the rate from one side  
418 of the boundary, which corresponds to the primitive streak (SI Methods). We also  
419 switched on the self-propulsion of the agents in the direction of the shape elongation  
420 and introduced a slight chemotaxis so that the agents move efficiently away from the  
421 primitive streak boundary (PS boundary). When the supply rate was high, the space was  
422 filled by the agents leaving no clear holes (Figure 5G,  $r_{source} = 0.00019$ ). In contrast,  
423 when the rate was decreased, small holes appeared, the size of which increased as the  
424 supply rate was further decreased (Figure 5G). These holes move away from the PS  
425 boundary in the lateral direction. The holes also showed dynamic behaviors, such as  
426 emergence, collapse, splitting and merging, due to the agent self-propulsion (Figure 5G,  
427  $r_{source} = 0.0001$ , and Video S7), which resembled the experimental observations of  
428 TG-chick embryos (Figure 3A, S3B, and S3C, and Video S3 and S4). To characterize

429 the structure quantitatively, we performed persistent homology analysis and found that  
430 the points of birth-death pairs with large lifetime were distributed in a hole branch  
431 around the death time  $\sim 0$  when the supply rate was small ( $r_{source} = 0.0001$ , Figure  
432 5G, bottom), consistent with the experimental observation (Figure 2F and 3B). As the  
433 supply rate increases, the holes void of cells became smaller and, correspondingly, the  
434 hole branch shrank. In consequence, when the supply rate  $r_{source} = 0.00019$ , the  
435 points were distributed in a clumped pattern near the diagonal line (Figure 5G, bottom).  
436 These results indicate that the supply rate, which controls the density of the cells in the  
437 mesoderm, is an additional important parameter for the meshwork formation. Note that  
438 the agents cannot form a meshwork structure at a very low density (Figure 5E). We also  
439 confirmed that the decrease in either the aspect ratio of agent shape or the attractive  
440 interaction prevented the formation of the meshwork structure when supply rate was  
441  $r_{source} = 0.0001$  (Figure 5H).

#### 442 **Dependence of mesoderm meshwork structure on the developmental stage**

443 Now a new question arises: How do the meshwork structures of the mesoderm cells  
444 change during the embryonic development? To answer this question, we performed a  
445 persistent homology analysis using the horizontal slice images at different  
446 developmental stages. Interestingly, we found that as the developmental stage proceeds,  
447 the size of holes decreases and eventually the space was filled by cells (Figure 6A, top).  
448 The corresponding PDs showed the points of birth-death pair with large lifetime were  
449 distributed in a hole branch around death time  $\sim 0$  at HH3+. However, as the  
450 developmental stage proceeded to HH4+, the hole branch shrank, and the distribution of  
451 the points was eventually changed to a clumped pattern near the diagonal line (Figure  
452 6A, bottom). The average radius of holes was reduced from about 8  $\mu\text{m}$  at HH3+ to 5

453  $\mu\text{m}$  at HH4+, which took about 6 hours (Figure 6C). Note that the average radius of the  
454 holes at HH3+ becomes 15  $\mu\text{m}$  when we focused on the larger holes by setting the  
455 threshold birth time to the same as that for Figures 2G and 3C (see also SI Methods).  
456 Thus, while the size of holes is maintained for about half an hour (Figure 3C), it  
457 gradually decreases over several hours. From the simulation results shown in Figure 5G,  
458 we speculated that the supply rate of mesoderm cell from the primitive streak increases  
459 gradually as the developmental stage proceeded. Therefore, we performed a simulation  
460 with a time-dependent supply rate of the agent from the PS boundary (SI Methods). We  
461 found that the size of the holes was initially large, but gradually decreased with time  
462 (Figure 6B). The radius of holes obtained from the PDs (Figure 6B bottom) decreases as  
463 well (Figure 6D), although the hole sizes in the simulation were slightly larger than  
464 those of the experiment. This quantitative difference might come from the fact that the  
465 shape of the cells in the simulation is kept constant, while the shape of the real  
466 mesoderm cells changes dynamically. Nevertheless, from these results, we conclude  
467 that one possible reason of the decrease of the hole size as the developmental stage of  
468 the embryo proceeds is the increase in the rate of the appearance of the mesoderm cells  
469 at the primitive streak.

470

471

## 472 **Discussion**

473 Our results revealed a novel mode of collective cell migration, in which the migrating  
474 nascent mesoderm cells form a dynamic meshwork structure in three-dimensional space  
475 between the epiblast and endoderm while moving collectively in the anterior-lateral  
476 direction. In the early gastrulation stage of chick embryos, the fate of the various cell

477 populations in the mesoderm has been studied in detail and it is known to be determined  
478 by the final migration destination (15). However, it was not well understood whether the  
479 mesoderm cells move collectively without scattering toward their destination. In  
480 addition, the mesoderm cells were thought to be densely packed without any spatial  
481 structure (15, 19). In this study, we investigated these points quantitatively by the 3D  
482 time lapse imaging and the horizontal thin optical sectioning of the mesoderm in fixed  
483 whole mount embryos applying tissue clearing method. From the analysis of the  
484 multicellular tracking data, we confirmed that the mesoderm cells migrate collectively  
485 with the characteristic decay length of about 60  $\mu\text{m}$ . In addition, from the horizontal thin  
486 sections, we found that the mesoderm cells form a meshwork structure. The diameter of  
487 the holes is about 30  $\mu\text{m}$ , which is almost comparable to the characteristic decay length  
488 of the collective migration. From these results, we presume that this meshwork structure  
489 is relevant to the collective migration of the mesoderm cells. Since only little  
490 extracellular matrix exists in the mesoderm (30–32), the formation of meshwork  
491 structure should be based on the intercellular adhesion. In fact, the disruption of the  
492 intercellular adhesion using a mutant form of N-cadherin resulted in the exclusion of the  
493 mutant cells from the meshwork of the control cells. Moreover, although the migration  
494 speed along trajectory is unaltered, the directionality of individual cell migration, the  
495 tissue progression speed, and the stability of the direction of collective motion were  
496 reduced for the mutant cells compared to the control cells. These results indicate that the  
497 cell-cell adhesion coordinates the migration of the mesoderm cells. To summarize, we  
498 conclude that the cell-cell adhesion plays a fundamental role in the meshwork formation  
499 for the mesoderm cells to migrate collectively. Such collective motion could contribute

500 to the robust formation of cell migration pattern in response to guidance signals such as  
501 chemoattractant and chemorepellent (19).

502     Extracting information about the organization and arrangement of cells in tissues  
503 from microscopy images and comparing them with mutants has been largely based on  
504 visual inspection. Moreover, their quantitative and objective characterization is often  
505 challenging because of their variability and lack of periodicity. To obtain the  
506 information of the holes of the meshwork structure in the mesoderm tissues such as  
507 their size and position objectively and automatically, we used persistent homology, a  
508 tool of topological data analysis (TDA). TDA is a recently growing unique  
509 methodology, and it provides geometric information of the complex data, which has  
510 been employed in physical, medical and biological research (28, 41–43). We used this  
511 method to extract the information of the dynamics of the meshwork structure, which is  
512 still a challenging task in TDA. By applying the same analysis method to the simulation  
513 result, we compared it with the experiment quantitatively and we successfully showed  
514 that the theoretical model captures the essential aspect of the meshwork formation  
515 observed experimentally.

516     The *in vivo* collective migrations of mesenchymal cell have been reported for the  
517 neural crest cells in frog and chick (8, 44). These neural crest cells migrate on a two-  
518 dimensional surface within a confined space with a physical barrier of neighboring  
519 tissues (8). Contact attraction (44) and contact inhibition (45) orient the cell motion to  
520 induce the collective cell migration such as chain migration and stream formation (46).  
521 In contrast, mesoderm cells at the early gastrulation stage migrate in the three-  
522 dimensional space between the epiblast and endoderm without physical barrier in the  
523 lateral direction. Almost all cells were attached to other cells. Upon collision, the

524 mesoderm cells stay in contact for more than a few tens of minutes (Figure S5A). Thus,  
525 contrary to the neural crest cells, the mesoderm cells did not show contact inhibition of  
526 locomotion, which is consistent with the case of the mouse mesoderm cells (47). In  
527 situations where cells exploit other cells as scaffolds and the cell density is low, we  
528 speculate that forming a meshwork rather than a three-dimensional mass would be more  
529 efficient to extend the distance.

530 In the nascent mesoderm tissue of chick embryo, matured ECM is almost absent in  
531 the intermediate layer where cells are in contact with other cells but not with the  
532 epiblast or endoderm (30–32). How cells in the intermediate layer can generate traction  
533 force for the movement is an intriguing future question. Mesoderm cells on the basal  
534 lamina of either epiblast or endoderm can generate traction force to migrate. By  
535 adhering to these cells, it may be possible that the mesoderm cells in the intermediate  
536 layer move forward together in a passive manner. In addition to such passive  
537 movement, the intermediate cells might generate active force at the intercellular  
538 contacts, by which they migrate further. Another possibility for the active process of the  
539 cell motility is the treadmilling of intercellular junction, which has been implicated in  
540 the migration of adhering cells (48).

541 During the vasculogenesis, endothelial cells also form a meshwork structure with  
542 cords of cells that surround the regions void of cells. In this case, cell aggregates formed  
543 initially are connected to organize into a primitive vascular plexus (49). The cell  
544 motions appear to be random along the cords (50). In contrast, the meshwork structure  
545 we observed is formed by the mesoderm cells which are provided from the primitive  
546 streak without the formation of cords of cells and a different lineage than the cells that  
547 contribute to the vasculogenesis. Moreover, the mesoderm cell motion is biased to the

548 anterior-lateral direction. Thus, although there are some similarities in the 2D horizontal  
549 section patterns, the 3D structures are different between these two cases.

550 During the development of enteric nervous system, enteric neural crest cells (ENCCs)  
551 migrating in the mesenchyme also form a meshwork structure within a narrow 2-  
552 dimensional layer (51). ENCCs migrate in chains and the cells immediately behind the  
553 preceding chains often follow the same path (52). Thus, the network created by the  
554 preceding cells often remained intact for many hours. This constant shape of the  
555 network contrasts with the dynamic properties of the meshwork structure formed by the  
556 mesodermal cells in the chick embryo.

557 To understand how the meshwork forms, we developed a theoretical model that  
558 demonstrated that the elongated shape of agents and the attractive interaction between  
559 them are the key factors for the formation of meshwork. While a previous study  
560 reported that the branches of a meshwork structure showed nematic order (39), it was  
561 not clear how a meshwork structure emerges as the density increases. We showed  
562 quantitatively that clusters composed of agents deforms in the direction of the nematic  
563 order of the agent elongation. As the density increases, the elongated clusters grow and  
564 finally fuse with each other to form a meshwork structure. Although the agents in the  
565 current model do not deform their shape, actual mesoderm cells do, which enables them  
566 to migrate. Presumably, the shape deformation may play an important role for the 3D  
567 meshwork structure formation where the intermediate cells have no scaffold to migrate  
568 other than other cells, like the one that we found in the mesoderm of chick embryo. It is  
569 thus a future work to investigate how the shape deformation of the agents contributes to  
570 the 3D meshwork structure formation.

571



572 **Acknowledgements**

573 We thank Guojun Sheng for critical reading of our manuscript and the members of  
574 Laboratory for Physical Biology for discussions. This work was supported by Kakenhi  
575 grant 16K07385 (YN) , 19H14673 (MT) and 22H05170 (TS), JST CREST Grant  
576 JPMJCR1852 (TS) and the core funding at RIKEN Center for Biosystems Dynamics  
577 Research (TS).

578

579

580 **Materials and Methods**

581 **Chick Embryo Collection and ex vivo culture**

582 Fertilized hen's egg (Shimojima farm, Kanagawa, Japan) or fertilized transgenic  
583 chicken's eggs (Avian Bioscience Research Center at Nagoya University) (Table S1)  
584 were incubated at 38.5°C until embryos reached the desired developmental Hamburger-  
585 Hamilton stage (20).

586

587 **Electroporation**

588 For electroporation, expression vectors were injected between the epiblast and vitelline  
589 membrane of embryos at a concentration of 2-5ug/ul and electroporated with 1mm  
590 platinum electrodes by using an electroporator (NEPA21 Super Electroporator;  
591 Nepagene) with the following parameters: 8.0 V, 0.5 ms width, one poring pulse,  
592 followed by 5.0 V, 25.0 ms width, 50 ms interval, five polarity exchanged transfer  
593 pulses. Embryos were then cultured for several hours according to the Easy Culture  
594 (EC) protocol (21).

595

596 **Generation of chick-N-Cadherin mutant**

597 Full-length of N-cadherin coding sequence (accession number NM\_001001615.1) was  
598 amplified by PCR from cDNA of HH 5-7 chick embryos using the following primers:  
599 Fw 5'-ATGTGCCGGATAGCGGGAAC-3' and Rev 5'-  
600 TCAGTCATCACCTCCACCG-3', which was subcloned into the pGEM-T Easy vector  
601 (Promega). The full-length of N-cadherin fragment was then used as a template to  
602 generate an N-cadherin mutant lacking the extracellular and transmembrane domains,  
603 which corresponds to amino acids 752-912 of the N-cadherin protein. To ensure

604 membrane localization of N-cadherin mutants, the second PCR reaction was performed  
605 using following primers in which the sequence of an N-myristoylation signal from Src  
606 kinase (53) was added at the 5' side of the forward primer: Fw 5'-  
607 ATGGGTTCTTCTAAATCTAAACCAAAAGATCCATCTCAACGTATGAAGCGCC  
608 GTGATAAGG-3', and Rev 5'-GTCATCACCTCCACCGTAC-3'. This amplified  
609 fragment was named N-Cad-M and was subcloned into the 5' side from P2A peptide  
610 (ATNFSLLKQAGDVEENPGP) of the pCAG-P2A-H2B-mCherry vector by In-Fusion  
611 Cloning (Takara, Japan). To visualize the membrane of cells that express N-Cad-M, the  
612 N-Cad-M-P2A was amplified by PCR with a DNA fragment set of 5'-  
613 GCGGCCGCGGATCCGCATGCGCCACCATGGGTTCTTCT-3' and 5'-  
614 TTGCTCACCATAACGCATGCTTTAGGTCCAGGGTTCTCC-3', which was then  
615 subcloned into the 5' side from the eGFP sequence of the pCAG-eGFP-CAAX-P2A-  
616 H2B-mCherry expression vector by In-Fusion Cloning. The above oligonucleotides  
617 used in this study are listed in Table S2 and the recombinant DNA constructed in this  
618 study are summarized in Table S3.

619

## 620 **Immunohistochemistry**

621 For immunohistochemistry, embryos are fixed in 4%PFA, and the following antibodies  
622 were used: Purified Mouse Anti-E-Cadherin (610181, BD transduction Lab); Anti-N-  
623 cadherin, polyclonal (Code No. M142, Takara bio); Monoclonal Anti-N-Cadherin/A-  
624 CAM (Clone GC-4, Product No. C2542, Sigma-Aldrich). Alexa Fluor secondary  
625 antibody (Goat anti-Rabbit IgG, Alexa Fluor 488, A-11034; Goat anti-Mouse IgG,  
626 Alexa Fluor 488, A-11029, Thermo Fisher Scientific) were used for double color  
627 detection. DAPI (Cellstain DAPI Solution, 1:100, 340-07901 Dojindo Laboratories) for  
628 the labeling the nucleus was used. After washing, embryos were cleared with SeeDB-  
629 2G solution (54) before being processed for imaging. Immunofluorescence images were  
630 captures with a laser scanning confocal microscope (FV3000RS with IX83 inverted;  
631 Olympus) equipped with UPLSAPO 30xS/1.05 NA, 60xS/1.3 NA objective lenses,  
632 using Fluoview (Olympus) as the image acquisition software. For each embryo, several  
633 images corresponding to different focal planes and different fields were captured using  
634 z-section and tiling functions. The acquired images were imported to Imaris 9.5.1  
635 (Oxford instruments, UK) to 3D-visualize for further analysis. The antibodies used in  
636 this study are summarized in Table S4.

637

## 638 ***in vivo* live imaging**

639 For *in vivo* live imaging, the H2B-eGFP-expressing WT chick embryos or the  
640 transgenic-GFP chick embryos was transferred dorsal side up on glass-base dish (Iwaki,  
641 3910-035) with semi-solid albumin/agarose (0.1%). Embryos were imaged at 38.5°C  
642 using an inverted multi-photon microscopy (Olympus MP, FVRS-F2SJ) coupled to a  
643 Maitai DeepSee HP laser at 890 nm wave length and InSight DeepSee laser at 1100nm  
644 using 25x/water 1.05 NA long distance objective lens (XLPLN25XW-MP).

645

### 646 **Obtaining the trajectory of individual mesoderm cells**

647 To obtain the trajectories of mesoderm cells, live imaging data of embryo expressing  
648 H2B-eGFP were analyzed using IMARIS (Oxford Instruments). The movement of each  
649 nucleus was identified using “*Spot*” function in the package “IMARIS for tacking” as  
650 described below. For identifying the nuclear position, we used “*Spot Detection*” with  
651 the parameter “*Estimated Diameter*” to be 6  $\mu\text{m}$  by adjusting the lowest threshold in  
652 “*Quality*” setting in the “*Filter*” section to a value with which the faintest nuclei were  
653 reliably distinguished from the background. For tracking, “*Autoregressive Motion*” were  
654 used in the “*Algorithm*” section with “*Max Distance*” to be 8 $\mu\text{m}$  and “*Max Gap Size*”  
655 to be 3 without using ‘*Fill gaps with all detected objects*’. We then removed the short  
656 tracks by applying the “*Track Duration* above 1800 s” in the “*Classify Tracks*” section.  
657 The trajectory data obtained in the above way was then exported as a comma-separated  
658 values (csv) file for the further analysis. Then, the mean square displacement,  
659 directionality, polar order parameter and mean square relative distance as described in  
660 the following sections were obtained using a custom-made code of Matlab (Mathworks  
661 Inc., Natick, MA).

662

### 663 **Individual cell speed**

664 The instantaneous velocity of each cell is defined by the displacement of the cell  
665 position in two subsequent images divided by the time interval. The individual cell  
666 velocity is calculated by averaging the instantaneous velocity over the trajectory. The  
667 individual cell speed is the magnitude of the individual cell velocity.

668

### 669 **Progression velocity and progression speed**

670 To calculate the tissue progression speed, the image window is divided into small  
671 regions of 50  $\mu\text{m}$  x 50  $\mu\text{m}$  as in Figure 1D. Then, the progression velocity is calculated  
672 as the temporal average of the average velocity of cells in each region at each time  
673 point. The progression speed is the magnitude of the progression velocity.

674

## 675 **Directionality**

676 The directionality was calculated using the formula given by

$$677 \text{Directionality} = \langle d/D \rangle$$

678 where  $d$  is the start-to-end distance and  $D$  is the actual length of trajectory between the  
679 start point and the end point. The bracket  $\langle \cdot \rangle$  indicates the average over the trajectories  
680 of the cells in a sample. The value of directionality depends on the time interval of the  
681 trajectory. In this paper, we consider the trajectories for 20 min. The directionality is  
682 close to unity when the motion is in a straight trajectory, while it is close to zero when  
683 the motion is random or when the trajectory forms a closed loop.

684

## 685 **Mean squared displacement**

686 For each sample, the mean squared displacement (MSD) was calculated for individual  
687 migrating cells and then average them over ensemble. The MSD for a given sample was  
688 calculated using the formula, given by

$$689 \text{MSD}(t) = \frac{1}{N(T-t)} \sum_{i=1}^N \sum_{\tau=1}^{T-t} \{\mathbf{r}_i(\tau+t) - \mathbf{r}_i(\tau)\}^2,$$

690 where  $\mathbf{r}_i(\tau)$ ,  $t$ ,  $T$ , and  $N$  are the 3D position of cell  $i$  at time  $\tau$ , the lag time, final time,  
691 and number of trajectories in the sample, respectively. To obtain the exponent  $\alpha$  of  
692 MSD, we fitted MSD( $t$ ) with the curve  $Dt^\alpha$  where  $D$  is a coefficient. For the fitting,  
693 we used lsqcurvefit of Matlab R2021b (mathworks). The exponent  $\alpha$  is 1 for random  
694 motion, while it is close to 2 if the motion is ballistic (straight). For  $1 < \alpha < 2$ , the  
695 motion is known as super-diffusion.

696

697

## 698 **Auto-correlation function of velocity**

699 For each sample, the auto-correlation function (ACF) of velocity was calculated for  
700 individual migrating cells and then average them over ensemble. The ACF of velocity  
701 for a given sample was calculated using the formula, given by

$$702 \text{ACF}(t) = \frac{1}{N(T-t)} \sum_{i=1}^N \sum_{\tau=1}^{T-t} \mathbf{v}_i(t+\tau) \cdot \mathbf{v}_i(\tau) \bigg/ \frac{1}{NT} \sum_{i=1}^N \sum_{\tau=1}^T \mathbf{v}_i(\tau) \cdot \mathbf{v}_i(\tau)$$

703 where  $\mathbf{v}_i(\tau)$ ,  $t$ ,  $T$ , and  $N$  are the velocity vector of cell  $i$  at time  $\tau$ , the lag time, final  
704 time, and number of trajectories in the sample, respectively. The ACF of velocity  
705 approaches to zero for sufficiently long time if there is no bias in the migration  
706 direction.

707

## 708 **Polar order parameter**

709 For the trajectories obtained by the tracking analysis, the polar order parameter at a  
710 given time was calculated using the formula, given by

$$711 \quad \varphi(t) = \left| \frac{1}{N} \sum_{i=1}^N \frac{\mathbf{v}_i(t)}{|\mathbf{v}_i(t)|} \right|,$$

712 where  $N$  is the number of tracked cells, and  $\mathbf{v}_i(t)$  is the instantaneous cell velocity of  
713 cell  $i$ . The polar order parameter  $\varphi(t)$  is close to unity if all cells move in the same  
714 direction, while it is close to zero if cells move in a random direction. For the data  
715 shown in Figure 1J, we calculated the temporal average of  $\varphi(t)$  in entire region  
716 ( $500\mu\text{m} \times 500\mu\text{m} \times z\text{-depth}$ ). For the data in Figures 4I and S4C, since the size of  
717 imaged region was different between embryo samples, we divided the imaged region  
718 into subareas ( $125\mu\text{m} \times 125\mu\text{m} \times z\text{-depth}$ ), in each of which we measured the temporal  
719 average of  $\varphi(t)$ . Then, they were averaged in each embryo.

720

## 721 **Mean squared relative distance (MSRD)**

722 We took a pair of cells which were initially at the distance less than  $20\mu\text{m}$ , supposing  
723 that these cells were in contact with each other at that moment. Then, the mean squared  
724 relative distance (MSRD) was calculated for the pairs using the following formula,

$$725 \quad \text{MSRD}(t) = \frac{1}{N(N-1)/2} \sum_{j=i+1}^N \sum_{i=1}^N \left| (\mathbf{r}_i(t) - \mathbf{r}_j(t)) - (\mathbf{r}_i(0) - \mathbf{r}_j(0)) \right|^2$$

726 where  $\mathbf{r}_i(t)$ , and  $N$  are the 3D position of cell  $i$  at time  $t$ , and number of trajectories in  
727 the sample, respectively.

728

## 729 **Topological structure analysis using persistent homology**

730 To characterize the meshwork structure in the mesoderm quantitatively, we focused on  
731 the holes void of cells. To this end, we performed persistent homology analysis by using  
732 the software named HomCloud (3.0.1) (27). We first prepared a black and white binary  
733 pixel image from the original image by thresholding, which was used as an input data  
734 for HomCloud. Each topological structure is characterized by a pair of two values called  
735 birth and death times based on Manhattan distance, and thus, they are given in the unit  
736 of pixel. These two quantities basically represent the size of the identified topological  
737 structures and the distance between two topological structures, respectively. For the  
738 detailed explanation of the concept of the birth and death times, see (27). In HomCloud,

739 the identified topological structures are visualized in persistence diagram (PD), which  
740 plots each pair of birth and death times. Since holes are identified by the 0th persistent  
741 homology, we focused on 0th PDs, i.e., the PDs for the 0th persistent homology. Each  
742 birth-death pair characterizes a black region in the binary image (Figure 2E)(Obayashi  
743 et al., 2018). The difference between the death and birth times is called lifetime. The  
744 topological structures with small lifetime are basically noise (27). Although in the  
745 original PD the points correspond to actual holes appear in the region with birth time  $<$   
746  $0$  and death time  $> 0$ , the death time of most holes in the experimental image becomes  
747 slightly smaller than  $0$  due to fluctuations possibly caused by several factors including  
748 those in staining and fluorescent imaging. By taking this into consideration, we  
749 identified the points with the birth time smaller than  $-10 \mu\text{m}$  and the death time larger  
750 than  $-2.5 \mu\text{m}$  as detected holes, except for the those in Figure 6C where the threshold is  
751 set as the birth time smaller than  $-5 \mu\text{m}$  and the death time larger than  $-2.5 \mu\text{m}$  because  
752 there was no hole satisfying the above stricter threshold for the later stage (Figures 6Ac  
753 and 6Ad). Since the magnitude of birth time corresponds to the shortest distance from  
754 the center to the periphery of a hole, we regarded this multiplied by the length of a pixel  
755 as the radius of the hole. The number of cells that surround each single hole was  
756 calculated from the perimeter length by assuming that a cell diameter is  $10 \mu\text{m}$ .

757

### 758 **Analyzing the dynamics of holes**

759 To visualize the spatiotemporal dynamic of holes, we first carried out the inverse  
760 analysis by HomCloud (27) for a total of 13 images at 2 min intervals out of the live  
761 imaging of 24 min and saved them as a series of images (Figure S3D bottom). From this  
762 2D image sequence, we constructed a z-stack image using the 3D image reconstruction  
763 function of IMARIS by setting the z-interval at  $5 \mu\text{m}$ . Each hole was visualized by the  
764 “*surface*” function in IMARIS. To ensure each hole was visualized individually and the  
765 adjacent holes were reliably split, we used the following parameters. We set  
766 “*Threshold*” to 130, enabling “*Split touching Objects (Region Growing)*” and the value  
767 of the “*Estimated Diameter*” to  $10 \mu\text{m}$ . We used “*Classify Seed Point*” for the filter  
768 type in “*Quality*” section with “*Lower Threshold*” set at 40. We manually chose five  
769 representative holes during 24 min of observation as shown in Figure 3D.

770

### 771 **Autocorrelation function of the direction of collective migration**

772 The direction of collective migration  $\hat{P}(t)$  is defined from

773 
$$\varphi(t)\widehat{\mathbf{P}}(t) = \frac{1}{N} \sum_{i=1}^N \frac{\mathbf{v}_i(t)}{|\mathbf{v}_i(t)|},$$

774 where  $\varphi(t)$  is the polar order parameter,  $N$  is the number of tracked cells, and  $\mathbf{v}_i(t)$  is  
775 the instantaneous cell velocity of cell  $i$ . The autocorrelation function of the direction of  
776 collective migration  $\widehat{\mathbf{P}}(t)$  is given by

777 
$$\text{ACF}(t) = \langle \widehat{\mathbf{P}}(t) \cdot \widehat{\mathbf{P}}(0) \rangle$$

778 where  $\langle \cdot \rangle$  indicates the average over ensemble. The direction of collective migration  
779  $\widehat{\mathbf{P}}(t)$  and its auto-correlation function  $\text{ACF}(t)$  were calculated for the cells in small  
780 regions of  $125\mu\text{m} \times 125\mu\text{m}$  along x- and y-coordinates, which is averaged for each  
781 sample.

782

### 783 **Measurement of aspect ratio**

784 To obtain the aspect ratio of cell shape (Figure S5B), we rendered fluorescently labeled  
785 cell membrane using the “surface” function in IMARIS. The shortest length and the  
786 longest length were obtained from object-oriented Bounding Box OO statistical  
787 variables of IMARIS (Figure S5B, top right). The aspect ratio was then calculated by  
788 dividing the longest length by the shortest length (Figure S5B, bottom right).

789

### 790 **Theoretical Model for the formation of meshwork-like structure**

791 In order to understand how the mesoderm cells organize into the meshwork structure,  
792 we introduce a mathematical model where each cell is represented by a self-propelled  
793 rod-shaped agent. To take into account the adhesion and volume exclusion between the  
794 cells, a short-range attractive interaction with a repulsive core is assumed between the  
795 agents. Since the typical size and migration speed of the cells are about  $10\mu\text{m}$  and  $3$   
796  $\mu\text{m}/\text{min}$ , we can assume that their dynamics is in the overdamped regime. Then, the  
797 equation of motion of the agent  $i$  is given by

798 
$$\gamma \frac{d\mathbf{r}_{i,p}}{dt} = \mathbf{F}_{i,p}^{\text{str}} + \mathbf{F}_{i,p}^{\text{act}} + \mathbf{F}_{i,p}^{\text{cell-cell}} + \boldsymbol{\xi}_{i,p} \quad (1)$$

799 Here, the actual degrees of freedom for each rod-shaped agent are given by the head  
800 ( $p = 2$ ) and tail ( $p = 1$ ) particles of the diameter  $d$  that are separated by the length  $\ell_c$ ,  
801 which gives the aspect ratio of the agent shape as  $r = (\ell_c + d)/d$ .  $\mathbf{r}_{i,p}$  is the position  
802 of the tail and head particles of the agent  $i$ , and the friction coefficient  $\gamma =$   
803  $3\pi\eta(3d + 2\ell_c)/5$  takes into account the effect of the elongated shape with the  
804 effective viscosity  $\eta$ . The agent shape is kept the same by the stretching elasticity  
805 acting between the head and tail particles:



$$806 \quad \mathbf{F}_{i,p}^{\text{str}} = \frac{\kappa^{\text{str}}}{\ell_c} (|\mathbf{r}_{i,2} - \mathbf{r}_{i,1}| - \ell_c) \frac{\mathbf{r}_{i,2} - \mathbf{r}_{i,1}}{|\mathbf{r}_{i,2} - \mathbf{r}_{i,1}|} (\delta_{p1} - \delta_{p2}). \quad (2)$$

807 Here,  $\delta_{pq}$  is the Kronecker delta that takes 1 if  $p = q$  and 0 otherwise. A constant  
808 effective self-propulsion force of the magnitude  $f^{\text{act}}$  is assumed acting only on the  
809 head particle as

$$810 \quad \mathbf{F}_{i,p}^{\text{act}} = f^{\text{act}} \frac{\mathbf{r}_{i,2} - \mathbf{r}_{i,1}}{|\mathbf{r}_{i,2} - \mathbf{r}_{i,1}|} \delta_{p2}. \quad (3)$$

811 To implement the interaction between the agents, each rod-shaped agent is discretized  
812 into  $M$  helper particles, including the head and tail particles, of the equal distance less  
813 than  $\frac{3}{8} \sigma^{\text{cc}}$ , and the interaction force is imposed between the closest helper particles of a  
814 pair of agents (see below). The force on the  $p$ th helper particle is imposed on the head  
815 and tail particles with the geometric weight  $1 - \alpha_p$  and  $\alpha_p$ , where  $\alpha_p |\mathbf{r}_{i,2} - \mathbf{r}_{i,1}|$  is  
816 the distance of the  $p$ th particle and the tail particle. As a result, the interaction force on  
817 particle  $p$  of agent  $i$  is given by

$$818 \quad \mathbf{F}_{i,p}^{\text{cell-cell}} = \sum_j \left( \sum_{p'=1}^M f_{i,p':j,q}^{i,p} - \sum_{q=1}^M f_{j,q:i,p'}^{i,p} \right). \quad (4)$$

819 Here,  $f_{i,p':j,q}^{i,p} = \left( (1 - \alpha_{p'}) \delta_{p1} + \alpha_{p'} \delta_{p2} \right) \mathbf{F}^{\text{cube}}(\mathbf{r}_{i,p'} - \mathbf{r}_{j,q}; \sigma^{\text{cc}}, \xi^{\text{cc}}, \epsilon_{\text{rep}}, \epsilon_{\text{atr}})$ , where  
820  $q$  is the particle index of agent  $j$  that is the closest to particle  $p'$  of agent  $i$ . Here, we  
821 use the following function of the short-range attraction with the repulsive core with the  
822 cutoff distance  $r < \sigma^{\text{cc}} + \xi^{\text{cc}}$  (55):

$$823 \quad \mathbf{F}^{\text{cube}}(\mathbf{r}; \sigma^{\text{cc}}, \xi^{\text{cc}}, \epsilon_{\text{rep}}, \epsilon_{\text{atr}}) = \begin{cases} 0 & (r - \sigma^{\text{cc}} \leq -\xi^{\text{cc}}) \\ (\epsilon_{\text{rep}} + \epsilon_{\text{atr}}) g'(-(r - \sigma^{\text{cc}})) \frac{\mathbf{r}}{r} & (-\xi^{\text{cc}} \leq r - \sigma^{\text{cc}} \leq 0) \\ -\epsilon_{\text{atr}} g'(r - \sigma^{\text{cc}}) \frac{\mathbf{r}}{r} & (0 \leq r - \sigma^{\text{cc}} \leq \xi^{\text{cc}}) \\ 0 & (\xi^{\text{cc}} \leq r - \sigma^{\text{cc}}) \end{cases} \quad (5)$$

824 where  $g'(r) = \frac{6r}{\xi^3}(\xi - r)$  is the derivative of  $g(r) = \frac{r^2}{\xi^3}(3\xi - 2r)$ . Finally,  $\xi_{i,k}$  is a

825 Gaussian white noise with zero mean and  $\langle \xi_{i,k,\alpha} \xi_{j,l,\beta} \rangle = \sigma \delta_{ij} \delta_{kl} \delta_{\alpha\beta}$  with the noise  
826 strength  $\sigma$ .

827 To understand the essential aspect of the meshwork formation, we consider the model  
828 in a two-dimensional space in the range  $-L_x/2 \leq x \leq L_x/2$ , and  $-L_y/2 \leq y \leq L_y/2$ ,  
829 where  $L_x$  and  $L_y$  are the system size. For the steady-state analysis, the periodic  
830 boundary conditions are assumed in both  $x$  and  $y$  directions. In the case where the cells



831 are supplied from one  $x$  boundary in the manner as described below, the periodic  
 832 boundary condition is assumed only in the  $y$  directions.

833 To mimic the experimental situation where the cells are supplied from the primitive  
 834 streak, we prepared the source of agents at  $x = -L_x/2$  from which the agents are  
 835 supplied at random  $y$  position at constant rate  $r_{source}$ . In the source, the agents undergo  
 836 random walk, without self-propulsion nor interaction with other agents, in a harmonic  
 837 potential centered at  $x_{source} = -(L_x + L_{source})/2$  that keeps the agents in the  
 838 source. Here,  $L_{source} = 2\ell_c$  is the width of the source. The agents that are supplied  
 839 from the source experience the repulsive interaction from the source within the cutoff  
 840 distance  $\frac{1}{2}(x_{i,1} + x_{i,2}) < x_{source} + L_{source}$ ,

$$841 \quad \mathbf{F}_{i,p}^{source} = \begin{cases} k^{source} \left( x_{source} + L_{source} - \frac{1}{2}(x_{i,1} + x_{i,2}) \right), & \left( \frac{1}{2}(x_{i,1} + x_{i,2}) < x_{source} + L_{source} \right) \\ 0, & \left( \frac{1}{2}(x_{i,1} + x_{i,2}) \geq x_{source} + L_{source} \right) \end{cases}, \quad (6)$$

842 in addition to the self-propulsion and interaction force. Furthermore, in this case, we  
 843 introduce the chemotactic force

$$844 \quad \mathbf{F}_{i,p}^{chemotaxis} = f^{chemotaxis} \left( 1 - \hat{x} \cdot \frac{\mathbf{r}_{i,2} - \mathbf{r}_{i,1}}{|\mathbf{r}_{i,2} - \mathbf{r}_{i,1}|} \right) (\delta_{p2} - \delta_{p1}) \hat{x} \quad (7)$$

845 which rotates the agents so that they tend to move away from the source. The other  $x$   
 846 boundary is the sink of agents. That is, when the agents reach the boundary at  $x =$   
 847  $L_x/2$ , the agents are taken away from the system and placed back to the source.  
 848 Therefore, the equation of motion of the agent  $i$  in this case is given by

$$849 \quad \gamma \frac{d\mathbf{r}_{i,p}}{dt} = \mathbf{F}_{i,p}^{str} + \mathbf{F}_{i,p}^{act} + \mathbf{F}_{i,p}^{cell-cell} + \mathbf{F}_{i,p}^{source} + \mathbf{F}_{i,p}^{chemotaxis} + \boldsymbol{\xi}_{i,p} \quad (8)$$

850 The parameters that were used in the numerical simulations are summarized in Table  
 851 S6. In the case that the cells are supplied from the source, additional parameters are  
 852 summarized in Table S7.

853 In the analysis shown in Figure 5F, to identify clusters of agents, we applied the  
 854 Cluster analysis modifiers of Ovito Pro (56) to the simulation data including all the  
 855 helper particles with the cutoff length  $\sigma^{cc} + \xi^{cc}/2$ . To quantify the elongation of the  
 856 cluster, we measured the gyration tensor of each cluster defined by

$$857 \quad S_{\alpha\beta} = \langle \tilde{r}_{i,p,\alpha} \tilde{r}_{i,p,\beta} \rangle_{i,p}, \quad (8)$$

858 where  $\tilde{r}_{i,p,\alpha}$  is the  $\alpha$  component of the position of helper particle  $p$  of agent  $i$   
 859 measured from the center of the cluster, the average  $\langle \cdot \rangle_{i,p}$  is calculated over helper  
 860 particles  $p$  of all agents  $i$  that belong to the cluster. By using this gyration tensor, we

861 calculated the cluster aspect ratio and the longitudinal angle as the square root of the  
862 ratio of the two eigenvalues,  $\sqrt{\lambda_+/\lambda_-}$  ( $\lambda_+ \geq \lambda_-$ ), and as the direction of the major  
863 principal axis, respectively. To eliminate small clusters, we took into account only the  
864 clusters composed of more than four cells.

865 The nematic order and the nematic angle of the cells in a cluster shown in Figure 5F  
866 are calculated as the magnitude and angle of the nematic director defined by

$$867 \quad \mathbf{n} = \langle (\cos 2\theta_i, \sin 2\theta_i) \rangle_i, \quad (9)$$

868 where  $\theta_i$  is the angle of the vector  $\frac{\mathbf{r}_{i,2}-\mathbf{r}_{i,1}}{|\mathbf{r}_{i,2}-\mathbf{r}_{i,1}|}$  of cell  $i$ . The average  $\langle \cdot \rangle_i$  is calculated

869 over the cells that belong to the cluster.

870

### 871 **Correlation between the cluster elongation and nematic order**

872 The correlation between the cluster elongation and the nematic order of the cells in the  
873 cluster (Figure 5F, right) is quantified by the order parameter defined by

$$874 \quad \langle \cos 2 \Delta\theta \rangle,$$

875 where  $\Delta\theta = \theta_l - \theta_n$  is the difference between the longitudinal angle  $\theta_l$  and the  
876 nematic angle  $\theta_n$  of each cluster. Here, note that both angles are of 2-fold rotational  
877 symmetry. To eliminate the effect of small or less-elongated clusters, the average  $\langle \cdot \rangle$  is  
878 calculated over the clusters composed of more than four cells and the aspect ratio larger  
879 than or equal to 2.

880

881

882

883 **References**

884

- 885 1. E. Scarpa, R. Mayor, Collective cell migration in development. *J Cell Biology* 212,  
886 143–155 (2016).
- 887 2. P. Friedl, D. Gilmour, Collective cell migration in morphogenesis, regeneration and  
888 cancer. *Nature Reviews Molecular Cell Biology* 10, 445–457 (2009).
- 889 3. M. Chuai, C. J. Weijer, Regulation of cell migration during chick gastrulation. *Curr*  
890 *Opin Genet Dev* 19, 343–349 (2009).
- 891 4. P. Friedl, R. Mayor, Tuning Collective Cell Migration by Cell–Cell Junction  
892 Regulation. *Csh Perspect Biol* 9, a029199 (2017).
- 893 5. K. Sato, *et al.*, Left–right asymmetric cell intercalation drives directional collective  
894 cell movement in epithelial morphogenesis. *Nat Commun* 6, 10074 (2015).
- 895 6. E. Theveneau, R. Mayor, Can mesenchymal cells undergo collective cell migration?  
896 The case of the neural crest. *Cell Adhesion & Migration* 5, 490–498 (2014).
- 897 7. A. Shellard, R. Mayor, Rules of collective migration: from the wildebeest to the  
898 neural crest. *Philosophical Transactions Royal Soc B Biological Sci* 375, 20190387  
899 (2020).
- 900 8. A. Szabó, R. Mayor, Mechanisms of Neural Crest Migration. *Annu Rev Genet* 52,  
901 43–63 (2018).
- 902 9. T. Hiraiwa, Two types of exclusion interactions for self-propelled objects and  
903 collective motion induced by their combination. *Physical Review E* 99, 012614 (2019).
- 904 10. C. Carmona-Fontaine, *et al.*, Complement fragment C3a controls mutual cell  
905 attraction during collective cell migration. *Developmental Cell* 21, 1026–1037 (2011).
- 906 11. M. E. Bronner, M. Simões-Costa, Chapter Seven The Neural Crest Migrating into  
907 the Twenty-First Century. *Curr Top Dev Biol* 116, 115–134 (2016).

- 908 12. Y. Nakaya, E. W. Sukowati, Y. Wu, G. Sheng, RhoA and microtubule dynamics  
909 control cell–basement membrane interaction in EMT during gastrulation. *Nat Cell Biol*  
910 10, 765–775 (2008).
- 911 13. Y. Nakaya, G. Sheng, Epithelial to mesenchymal transition during gastrulation: an  
912 embryological view. *Development, Growth & Differentiation* 50, 755–766 (2008).
- 913 14. O. Voiculescu, L. Bodenstein, I.-J. Lau, C. D. Stern, Local cell interactions and self-  
914 amplifying individual cell ingression drive amniote gastrulation. *eLife* 3, 3521 (2014).
- 915 15. D. Psychoyos, C. D. Stern, Fates and migratory routes of primitive streak cells in the  
916 chick embryo. *Dev Camb Engl* 122, 1523–34 (1996).
- 917 16. T. Iimura, X. Yang, C. J. Weijer, C. J. Weijer, O. Pourquie, Dual mode of paraxial  
918 mesoderm formation during chick gastrulation. *Proceedings of the National Academy of*  
919 *Sciences* 104, 2744–2749 (2007).
- 920 17. G. S. Nájera, C. J. Weijer, Cellular processes driving gastrulation in the avian  
921 embryo. *Mech Develop* 163, 103624 (2020).
- 922 18. M. Chuai, D. Hughes, C. J. Weijer, Collective epithelial and mesenchymal cell  
923 migration during gastrulation. *Current genomics* 13, 267–277 (2012).
- 924 19. X. Yang, D. Dormann, A. E. Münsterberg, C. J. Weijer, Cell Movement Patterns  
925 during Gastrulation in the Chick Are Controlled by Positive and Negative Chemotaxis  
926 Mediated by FGF4 and FGF8. *Developmental Cell* 3, 425–437 (2002).
- 927 20. V. Hamburger, H. L. Hamilton, A series of normal stages in the development of the  
928 chick embryo. *J Morphol* 88, 49–92 (1951).
- 929 21. S. C. Chapman, J. Collignon, G. C. Schoenwolf, A. Lumsden, Improved method for  
930 chick whole-embryo culture using a filter paper carrier. *Dev Dyn* 220, 284–289 (2001).
- 931 22. R. Gorelik, A. Gautreau, Quantitative and unbiased analysis of directional  
932 persistence in cell migration. *Nature Protocols* 9, 1–13 (2019).
- 933 23. E. Méhes, T. Vicsek, Collective motion of cells: from experiments to models.  
934 *Integrative biology : quantitative biosciences from nano to macro* 6, 831–854 (2014).

- 935 24. M. A. England, J. Wakely, Scanning electron microscopy of the development of the  
936 mesoderm layer in chick embryos. *Anat Embryol* 150, 291–300 (1977).
- 937 25. M. A. England, J. Wakely, Endoderm regeneration in the chick embryo studied by  
938 SEM. *Anat Embryol* 154, 55–66 (1978).
- 939 26. M. Buchet, Y. Hiraoka, I. Obayashi, “Nanoinformatics” in Nanoinformatics.,  
940 (Springer Singapore, 2018), pp. 75–95.
- 941 27. I. Obayashi, Y. Hiraoka, M. Kimura, Persistence diagrams with linear machine  
942 learning models. *J Appl Comput Topol* 1, 421–449 (2018).
- 943 28. Y. Hiraoka, *et al.*, Hierarchical structures of amorphous solids characterized by  
944 persistent homology. *Proc National Acad Sci* 113, 7035–7040 (2016).
- 945 29. M. Motono, *et al.*, Production of transgenic chickens from purified primordial germ  
946 cells infected with a lentiviral vector. *J Biosci Bioeng* 109, 315–321 (2010).
- 947 30. J. Hoof, F. Harrisson, L. Andries, L. Vakaet, Microinjection of glycosaminoglycan-  
948 degrading enzymes in the chicken blastoderm. *Differentiation* 31, 14–19 (1986).
- 949 31. E. J. Sanders, Mesoderm Migration in the Early Chick Embryo. *Dev Biology New*  
950 *York N Y* 1985 2, 449–480 (1986).
- 951 32. E. J. Sanders, Development of the basal lamina and extracellular materials in the  
952 early chick embryo. *Cell Tissue Res* 198, 527–537 (1979).
- 953 33. A. J. Brown, E. J. Sanders, Interactions between mesoderm cells and the  
954 extracellular matrix following gastrulation in the chick embryo. *J Cell Sci* 99 ( Pt 2),  
955 431–41 (1991).
- 956 34. X. Yang, H. Chrisman, C. J. Weijer, PDGF signalling controls the migration of  
957 mesoderm cells during chick gastrulation by regulating N-cadherin expression.  
958 *Development* 135, 3521–3530 (2008).
- 959 35. P. K. Moly, J. R. Cooley, S. L. Zeltzer, T. A. Yatskievych, P. B. Antin, Gastrulation  
960 EMT Is Independent of P-Cadherin Downregulation. *Plos One* 11, e0153591 (2016).

- 961 36. M. T. Nieman, J. B. Kim, K. R. Johnson, M. J. Wheelock, Mechanism of  
962 extracellular domain-deleted dominant negative cadherins. *J Cell Sci* 112, 1621–1632  
963 (1999).
- 964 37. M. Ozawa, W. Kobayashi, Cadherin Cytoplasmic Domains Inhibit the Cell Surface  
965 Localization of Endogenous E-Cadherin, Blocking Desmosome and Tight Junction  
966 Formation and Inducing Cell Dissociation. *Plos One* 9, e105313 (2014).
- 967 38. M. Ozawa, The N-cadherin cytoplasmic domain confers anchorage-independent  
968 growth and the loss of contact inhibition. *Sci Rep-uk* 5, 15368 (2015).
- 969 39. M. M. Palm, R. M. H. Merks, Vascular networks due to dynamically arrested  
970 crystalline ordering of elongated cells. *Phys Rev E* 87, 012725 (2013).
- 971 40. A. Szabo, E. D. Perryn, A. Czirok, Network Formation of Tissue Cells via  
972 Preferential Attraction to Elongated Structures. *Phys Rev Lett* 98, 038102 (2007).
- 973 41. P. Lawson, A. B. Sholl, J. Q. Brown, B. T. Fasy, C. Wenk, Persistent Homology for  
974 the Quantitative Evaluation of Architectural Features in Prostate Cancer Histology. *Sci*  
975 *Rep-uk* 9, 1139 (2019).
- 976 42. C. M. Topaz, L. Ziegelmeier, T. Halverson, Topological Data Analysis of  
977 Biological Aggregation Models. *Plos One* 10, e0126383 (2015).
- 978 43. M. R. McGuirl, A. Volkening, B. Sandstede, Topological data analysis of zebrafish  
979 patterns. *Proc National Acad Sci* 117, 5113–5124 (2020).
- 980 44. Y. Li, *et al.*, In Vivo Quantitative Imaging Provides Insights into Trunk Neural  
981 Crest Migration. *Cell Reports* 26, 1489-1500.e3 (2019).
- 982 45. C. Carmona-Fontaine, *et al.*, Contact inhibition of locomotion in vivo controls  
983 neural crest directional migration. *Nature* 456, 957–961 (2008).
- 984 46. A. Szabó, E. Theveneau, M. Turan, R. Mayor, Neural crest streaming as an  
985 emergent property of tissue interactions during morphogenesis. *Plos Comput Biol* 15,  
986 e1007002 (2019).
- 987 47. B. Saykali, *et al.*, Distinct mesoderm migration phenotypes in extra-embryonic and  
988 embryonic regions of the early mouse embryo. *eLife* 8, e42434 (2019).

- 989 48. F. Peglion, F. Llense, S. Etienne-Manneville, Adherens junction treadmilling during  
990 collective migration. *Nat Cell Biol* 16, 639–651 (2014).
- 991 49. W. Risau, I. Flamme, Vasculogenesis. *Annu Rev Cell Dev Bi* 11, 73–91 (1995).
- 992 50. Y. Sato, *et al.*, Dynamic Analysis of Vascular Morphogenesis Using Transgenic  
993 Quail Embryos. *PLoS ONE* 5, e12674-12 (2010).
- 994 51. D. F. Newgreen, S. Dufour, M. J. Howard, K. A. Landman, Simple rules for a  
995 “simple” nervous system? Molecular and biomathematical approaches to enteric  
996 nervous system formation and malformation. *Dev Biol* 382, 305–319 (2013).
- 997 52. H. M. Young, *et al.*, Dynamics of neural crest-derived cell migration in the  
998 embryonic mouse gut. *Developmental Biology* 270, 455–473 (2004).
- 999 53. J. M. Kaplan, G. Mardon, J. M. Bishop, H. E. Varmus, The first seven amino acids  
1000 encoded by the v-src oncogene act as a myristylation signal: lysine 7 is a critical  
1001 determinant. *Mol Cell Biol* 8, 2435–2441 (1988).
- 1002 54. M.-T. Ke, *et al.*, Super-Resolution Mapping of Neuronal Circuitry With an Index-  
1003 Optimized Clearing Agent. *Cell Reports* 14, 2718–2732 (2016).
- 1004 55. S. K. Schnyder, J. J. Molina, R. Yamamoto, Control of cell colony growth by  
1005 contact inhibition. *Sci Rep-uk* 10, 6713 (2020).
- 1006 56. A. Stukowski, Visualization and analysis of atomistic simulation data with OVITO–  
1007 the Open Visualization Tool. *Model Simul Mater Sc* 18, 015012 (2010).
- 1008
- 1009

1010 **Figure Legends**

1011 **Figure1. Mesoderm cells move collectively during gastrulation.**

1012 (A) Schematic diagram of the chicken embryo at stage HH3. The observation regions  
1013 are marked by the square boxes in the right panels (A: Anterior, M: Middle, P:  
1014 Posterior). (B) Experimental procedure. DNA encoding H2B-eGFP was introduced into  
1015 the cells in the primitive streak at stage HH3 by electroporation. After several hours of  
1016 incubation, the position of the labeled nuclei was recorded using a multi-photon  
1017 microscope. (C) Examples of the obtained images of the mesoderm cells expressing  
1018 H2B-eGFP (upper panels) and reconstructed 3D trajectories (bottom panels). The x, y,  
1019 and z axes correspond to the mediolateral, anterior-posterior, and dorsoventral axes,  
1020 respectively. Scale bar: 50 $\mu$ m. (D) Spatial distribution of progression velocity (arrows)  
1021 and progression speed (color). (E) Individual cell speed (o) and progression speed (x),  
1022 and (F) directionality. Each data point of the individual cell speed and the directionality  
1023 represents the average over the cells and that of the progression speed is the average  
1024 over the subareas in each region of the 6 embryos. (G) Mean squared displacement  
1025 (MSD). Each line corresponds to the MSD in each region of the 6 embryos. (H)  
1026 Exponent of the MSD plotted in (G). (I) Polar order parameter  $\varphi$  plotted against the  
1027 radius of the measurement area. The polar order parameter calculated for the cells in the  
1028 circular areas of a given radius at each time was averaged over the areas and time in  
1029 each region of the 6 embryos (the crosses and error bars). (J) Mean squared relative  
1030 distance (MSRD). Each line represents the MSRD in each region of the 6 embryos. On  
1031 a time scale larger than about 10 min, the exponent of the MSRD becomes 1. The  
1032 numbers of cells analyzed are N=1525 (A), 1112(M), 791(P) (embryo 1), 371(A), 416  
1033 (M), 235 (P) (embryo 2), 398 (A), 388 (M), 316 (P) (embryo 3), 230 (A), 296 (M), 175



1034 (P) (embryo 4), 1386 (A), 1283 (M), 964 (P) (embryo 5), 1040 (A), 1102 (M), 496 (P)  
1035 (embryo 6).

1036

1037 **Figure 2. Meshwork structure in mesoderm during gastrulation.**

1038 (A) Schematics of the 3D imaging. The white box indicates the imaged area shown in  
1039 (B). (B) Spatial distribution of the cells in the fixed mesoderm tissue stained for nuclei  
1040 (cyan) and N-cadherin (green) in the z-projection view (left) and the horizontal section  
1041 (middle and right). (C) Magnified view of the characteristic meshwork structure in the  
1042 white box in (B). (D) N-cadherin expression in the middle section of the mesoderm. (E)  
1043 Binary images of three z-sections in the white box in (D). (F) Persistence diagram (PD)  
1044 obtained by applying persistent homology analysis to the three z-sections in (E). The  
1045 pixel size in (E) is 0.192  $\mu\text{m}$ . The points forming a hole branch around death time  $\sim 0$   
1046 correspond to the holes. (G) Statistics of the radius of holes that appear in the hole  
1047 branch in the PD and the number of the cells surrounding the holes given that the cell  
1048 diameter is 10  $\mu\text{m}$ .

1049

1050 **Figure 3. Dynamic meshwork structure.**

1051 (A) Successive snapshots obtained from a live image of mesoderm tissue. The position  
1052 of the 6 cells at different time points are indicated by the colored asterisk. (B)  
1053 Persistence diagram (PD) of the three snapshots in (A). The hole branch of the points  
1054 around death time  $\sim 0$  away from the diagonal line. The pixel size in (A) is 0.22  $\mu\text{m}$ . (C)  
1055 The time series of the radius of holes that appear in the hole branch in the PD, and the  
1056 corresponding number of the cells surrounding the holes that is calculated from the  
1057 radius under the assumption that the cell diameter is 10  $\mu\text{m}$ . The p-values between any

1058 two time points obtained by t-test were larger than 0.05 except for the pairs of 0 min  
1059 and 8 min, 0 min and 12 min, 0 min and 16 min, 0 min and 20 min, 0 min and 24 min, 4  
1060 min and 12 min ( $p < 0.01$ ), and 8 min and 12 min ( $p < 0.05$ ), which might possibly be  
1061 caused by the small size of the data set. (D) Spatiotemporal diagram of the holes. The  
1062 holes were dynamic with the appearance (4) and disappearance (2,3) as well as the  
1063 fusion (5) and fission (2).

1064

1065 **Figure 4. Intercellular adhesion controlling collective mesoderm cell migration.**

1066 (A) N-cadherin expression in the mesoderm. N-cadherin was localized at the cell-cell  
1067 contact sites both in the horizontal section (left) and in the vertical section (right) that  
1068 surround the holes. Scale bars, 10  $\mu\text{m}$ . (B) Structure of the wild-type N-cadherin and the  
1069 deletion mutant of N-cadherin consisting of the cytoplasmic domain with myristoylation  
1070 signal (top). Schematic diagram of the experimental method (bottom). To compare the  
1071 migration of the mesoderm cells, H2B-eGFP was electroporated on the A side, while  
1072 the N-cadherin mutant (N-Cad-M) was electroporated on the B side. The N-Cad-M  
1073 expressing cells were marked by the H2B-mCherry expression. (C) Effects of N-Cad-M  
1074 overexpression on endogenous cadherin expression. Endogenous N-cadherin (left) and  
1075 P-cadherin (right) are expressed specifically at the cell-cell contact site in the control  
1076 mesoderm cells (white arrow heads). In contrast, in the cells expressing N-Cad-M  
1077 labeled in red, the expression of N-cadherin (left) and P-cadherin (right) were almost  
1078 disappeared from the cell membrane (yellow arrow heads). Scale bars, 10  $\mu\text{m}$ . (D) N-  
1079 Cad-M expressing cells are excluded from the meshwork structure of control mesoderm  
1080 cells (yellow arrow heads). (D1) and (D2) Magnified images in the white boxes in the  
1081 top panel. The N-Cad-M expressing cells did not participate in the meshwork. Scale bar,

1082 100  $\mu\text{m}$ . (E) Examples of (top) a snapshot of the live imaging and (bottom) trajectories  
1083 of the mesoderm cells expressing H2B-eGFP (A side) and the N-cad-M (B side) of the  
1084 same embryo. The initial position of the cells is marked by dots on the trajectories. (F-  
1085 K) Statistical quantification of the migration behavior of the control and N-cad-M cells  
1086 for five embryos. The corresponding statistical quantity of each cell in each embryo is  
1087 shown in Figure S4. The quantities of control and N-Cad-M in the same embryo are  
1088 linked by the line. (F) Mean of individual cell speed ( $p=0.47$ ). (G) Mean of  
1089 directionality ( $p=0.0095$ ). (H) MSD exponent ( $p=0.00979$ ). (I) Mean of progression  
1090 speed ( $p=0.02$ ). (J) Polar order parameter ( $p=0.081$ ). (K) Auto-correlation function  
1091 (ACF) of the direction of collective migration at 10 min ( $p=0.0075$ ).  $p$ -values were  
1092 obtained using paired t-test of the five embryos. The xy size of the imaged square area  
1093 of 5 embryos: 258, 192, 207, 500, 500  $\mu\text{m}$ . The numbers of cells analyzed: N=118  
1094 (Control), 119 (Mutant) (embryo 1), 41(C), 28(M) (embryo 2), 44 (C), 30 (M) (embryo  
1095 3), 253 (C), 290 (M) (embryo 4), 297 (C), 232 (M) (embryo 5).

1096

### 1097 **Figure 5. Theoretical model of meshwork formation.**

1098 (A) Impact of the attractive interaction strength  $\epsilon_{\text{atr}}$  on the meshwork structure  
1099 formation. (B) Dependence of the birth time of the holes on the attractive interaction  
1100 strength  $\epsilon_{\text{atr}}$ . The error bars indicate the standard error of mean obtained from  $n=10$   
1101 independent simulations. (C) Impact of the agent aspect ratio  $r$  on the meshwork  
1102 structure formation. (D) Dependence of the birth time of the holes on the aspect ratio  $r$   
1103 obtained from the persistent homology analysis. The error bars indicate the standard  
1104 error of mean obtained from  $n=10$  independent simulations. (E) Alignment of the agents  
1105 in the aggregates and the meshwork structure. Aspect ratio  $r=4$ . (F) Relation between

1106 the nematic direction of agents in the aggregates and the elongation direction of the  
1107 aggregates. (left) Relationship between the nematic angle and the longitudinal angle of  
1108 each aggregate. The color of the points represents the aspect ratio of the aggregates.  
1109 (right) The correlation between the nematic angle  $\theta_n$  and the aggregate longitudinal  
1110 angle  $\theta_a$  defined by  $\langle \cos 2(\theta_n - \theta_a) \rangle$  as a function of the aggregate density for  
1111 different aspect ratio  $r$ . (G) Impact of the agent supply rate on the meshwork structure  
1112 formation in the simulation with the agents supplied from the PS boundary on the left.  
1113 Snapshots (top) and persistence diagrams (PD) (bottom). (H) Impact of the adhesion  
1114 and the aspect ratio on the meshwork structure formation in the simulation with the  
1115 agents supplied from the PS boundary. Snapshots (left) and PD (right).

1116

1117 **Figure 6. Changes in the meshwork structure during development.**

1118 (A) Spatial distribution of the cells in the mesoderm tissue stained for nuclei (cyan) and  
1119 N-cadherin (white) at different developmental stages (top) and the corresponding  
1120 persistence diagrams (PD) (bottom). The persistent homology analysis was performed  
1121 using binary images. The pixel size is  $0.215 \mu\text{m}$ . (B) Simulation with the supply of the  
1122 agents where the supply rate increases with time. Snapshots (top) and the corresponding  
1123 PD. (C) The radius of holes that appear in the hole branch in the PD in (A). (D) The  
1124 radius of holes that appear in the hole branch in the PD in (B).

1125

1126

1127

1128 **Figure S1 Motility analysis of mesoderm cells.** Related to Figure 1. (A) Analysis of

1129 the cell motility in the z-direction. Probability density function obtained from the six

1130 embryos indicates the frequency of the range of cell motion in z direction, which were  
1131 obtained as the difference between the maximum and minimum z positions of  
1132 individual trajectories that were in the image window for more than 60 min. The  
1133 numbers of cells analyzed are N=1096, 350, 396, 302, 1455, 1044. The thick red line  
1134 indicates the probability density function averaged over six samples. (B) Individual cell  
1135 speed and progression speed in the anterior, middle, and posterior regions for the data  
1136 shown in Figure 1D. The average ( $\bar{x}$ ) and the standard deviation (error bars) were  
1137 shown. (C) Correlation between directionality and the MSD exponent. (D) Auto-  
1138 correlation function of velocity for each sample.

1139

1140 **Figure S2. Meshwork structures in the mesoderm and quantitative analysis by**  
1141 **persistent homology.** Related to Figure 2. (A) Transvers section of the embryo. (A1)  
1142 Horizontal section of the whole chicken embryo at stage HH 4. (A2) Transverse section  
1143 along the horizontal yellow line in (A1). (A3) Magnified view of the white box in (A2).  
1144 The holes are marked by the yellow asterisks. Scale bars; (A1) 200 $\mu$ m; (A2) 50 $\mu$ m. (B)  
1145 Correspondence of the points in the persistence diagram (PD) and the holes in the input  
1146 image obtained by the advanced inverse analysis. The data corresponds to that in Figure  
1147 2E upper and 2F upper. (B1) The points with large lifetime in PD form a hole branch  
1148 around death time  $\sim 0$ . (B2) Magnified view of the red box in B1 showing the hole  
1149 branch of the points, which correspond to the holes in the input binary image (B3). The  
1150 numbers assigned to each point in (B2) correspond to those in B3, which confirms the  
1151 correspondence between the birth-death pairs and the holes. Scale bar, 30  $\mu$ m in B2.

1152

1153 **Figure S3. 4D (xyzt) visualization of mesoderm cell migration using TG-GFP chick**

1154 **embryo.** Related to Figure 3. (A) Image of the time frame  $t=0$  min of the live imaging.

1155 The transverse (horizontal) view was obtained at the level indicated by the yellow

1156 dotted line in the horizontal (transverse) view. Scale bars, 50  $\mu\text{m}$ . See also Video S4.

1157 (B) Change of the meshwork structure over time. The holes in the images of 0 min

1158 (red), 15 min (yellow), 25 min (blue) and 35 min (green) are manually traced. (C)

1159 Displacement of the contour of the holes traced manually during 35 min. The holes

1160 move in the anterior-lateral direction during the observation as indicated by the arrows.

1161 Scale bar, 50  $\mu\text{m}$ . (D) Input binarized images used for the persistent homology analysis

1162 and the extracted images by using the advanced inverse analysis. The five holes labelled

1163 by ①-⑤ are extracted to visualize their time evolution in Figure 3D by stacking them

1164 along the  $t$  axis.

1165

1166 **Figure S4 Statistical analysis of the collective migration of control cells and N-**

1167 **cadherin mutant expressing cells for the five embryos.** Related to Figure 4.

1168 Distribution of (A) individual cell speed, (B) directionality of individual cells, (C)

1169 progression speed of 50  $\mu\text{m}$  x 50  $\mu\text{m}$  areas, and (D) polar order parameter of 125 $\mu\text{m}$  x

1170 125 $\mu\text{m}$ , and (E) autocorrelation function (ACF) of the direction of collective migration.

1171 (A)-(D) Each circle (o) plots the temporal average. The average (x) over (A-B) the cells

1172 and (C-D) the areas and their standard error (error bar) were shown. P-values indicated

1173 in the graphs were obtained from Wilcoxon rank sum test between the control and

1174 mutant cells. In embryo ID 1, 2 and 4, the polar order parameter on the control side was

1175 higher than that on the mutant side. In embryo ID 3 and 5, the difference was not

1176 statistically significant. (E) The average and the standard error of means of ACF  
1177 calculated for each subarea (125 $\mu$ m x 125 $\mu$ m) are shown.

1178

1179 **Figure S5. Over-expression of N-Cadherin mutant changes in cell morphology and**

1180 **intercellular properties.** Related to Figures 4 and 5. (A) Snapshots of the live imaging

1181 of the control cells (upper panels) and the N-Cad-M expressing cells (lower panels).

1182 Cell membrane is marked by GFP-CAAX. The numbers (1-5 in the images of control

1183 cells, 1-7 in the images of N-cadherin mutant cells) are assigned to track the cells. Scale

1184 bars, 10  $\mu$ m. (B) Multiphoton images of the control cells and the N-Cad-M expressing

1185 cells (“Raw image” in the left panel). Cell membrane is marked by GFP-CAAX and

1186 extracted by surface function of IMARIS software (“Extracted cells by Surface

1187 Function” in the left panel). (B right top panel) A schematic diagram shows the shortest

1188 length and the longest length of a cell. a: Length of the shortest principal axis. b: Length

1189 of the longest principal axis. The software identifies a cell by considering the object-

1190 oriented minimal rectangular box, as shown in red. (B right bottom panel) Aspect ratio

1191 of the control cells and the N-Cad-M expressing cells. Error bars are the standard error

1192 of mean; N=51 (control), N=37 (N-cad mutant). Asterisk,  $p < 0.001$  (t-test).

1193

1194 **Video S1. Mesoderm cell movements on gastrulating chick embryo.** Related to

1195 Figure 1. Left: Nuclei of mesoderm cells are labelled by H2B-eGFP expression (green).

1196 Right: Cell trajectories by IMARIS tracking in the anterior, middle and posterior

1197 regions. Scale bars, 50  $\mu$ m.

1198

1199 **Video S2. Meshwork structure in the mesoderm.** Related to Figure 2. Confocal Z-  
1200 stack images of the mesoderm and the primitive streak of stage HH4 chick embryo. The  
1201 embryo is stained for nuclei with DAPI (cyan) and for N-cadherin (green). Z-stack  
1202 images with a thickness of 1.5  $\mu\text{m}$  show that the characteristic meshwork structures are  
1203 composed of multiple cells in the mesoderm located on both sides of the primitive  
1204 streak. ps, primitive streak.

1205

1206 **Video S3. Mesoderm cells forming a dynamic meshwork during migration.** Related  
1207 to Figure 3. Live imaging of a thin section (5 $\mu\text{m}$ ) of the mesoderm of stage HH4 GFP  
1208 expressing transgenic chicken embryo. The mesoderm cells migrate from the primitive  
1209 streak by forming a dynamic meshwork structure undergoing continual and rapid re-  
1210 organization. ps, primitive streak. Scale bar, 50 $\mu\text{m}$ .

1211

1212 **Video S4. Dynamics of the meshwork structure.** Related to Figures S3A and B. 4D  
1213 live imaging of the mesoderm of stage HH4 GFP expressing transgenic chicken  
1214 embryo. The optical transvers section and horizontal section, monitored for 40 min,  
1215 shows that the three-dimensional dynamic meshwork structure is formed by the  
1216 migrating mesoderm cells and the holes move toward the anterior-lateral direction. ps,  
1217 primitive streak. Scale bar, 50  $\mu\text{m}$ .

1218

1219 **Video S5. Cell trajectories of the N-Cadherin mutant expressing cells and the**  
1220 **control cells.** Related to Figure 4. Left, Control side: Nuclei of mesoderm cells are  
1221 labelled by H2B-eGFP expression (control, green). Most mesoderm cells away from the  
1222 primitive streak migrate toward the anterior-lateral direction. Right, N-cadherin mutant



1223 side: The N-cadherin deletion mutant expressing cells are detectable by H2B-mCherry  
1224 expression. These cells also migrate in the anterior-lateral direction but exhibit zigzag  
1225 trajectories, which is apparently different from the control cells. Scale bars, 30 $\mu$ m.

1226

1227 **Video S6. Cell-cell contact behaviors in the N-Cadherin mutant expressing cells**

1228 **and the control cells.** Related to Figure S5A. Cell membrane of the control cells and of

1229 the N-Cad-M expressing cells are detected by GFP-CAAX expression. Left: The control

1230 cells undergo continual contact with the surrounding cells. Right: The N-Cad-M

1231 expressing cells change the contact partners one after another during the observation.

1232 Scale bars, 10  $\mu$ m.

1233

1234 **Video S7. Meshwork structure formation in the simulation with agent supply.**

1235 Related to Figure 5H. The agents were supplied from the PS boundary (left boundary).

1236 The head particle and the tail particles of an agent are indicated by blue and magenta

1237 colors, respectively.

1238

1239

1240 Table S1. Experimental Models: Organisms/Strains

|                                        |                                                      |  |
|----------------------------------------|------------------------------------------------------|--|
| Wild Type Chicken Eggs                 | Shimojima farm,<br>Kanagawa, JP                      |  |
| Tg (pLSi/ $\Delta$ AeGFP) Chicken Eggs | ABRC, University<br>of Nagoya; Motono<br>et al. 2010 |  |

1241

1242

1243 Table S2. Oligonucleotides used in this study

|                                                                                                |                                     |     |
|------------------------------------------------------------------------------------------------|-------------------------------------|-----|
| N-cadherin cloning primer Fw 5'-<br>ATGTGCCGGATAGCGGGAAC-3'                                    | Hokkaido System<br>Science Co., Ltd | n/a |
| N-cadherin cloning primer Rev 5'-<br>TCAGTCATCACCTCCACCG-3'                                    | Hokkaido System<br>Science Co., Ltd | n/a |
| N-Cad-M primer 1 Fw 5'-<br>ATGGGTCTTCTAAATCTAAACCAAAGATCC<br>ATCTCAACGTATGAAGCGCCGTGATAAGG-3', | Fasmac                              | n/a |
| N-Cad-M primer 1 Rev 5'-<br>GTCATCACCTCCACCGTAC-3'                                             | Fasmac                              | n/a |
| N-Cad-M primer 2 Fw 5'-<br>GCGGCCGCGGATCCGCATGCGCCACCATGGGT<br>TCTTCT-3'                       | Thermo Fisher                       | n/a |
| N-Cad-M primer 2 Rev 5'-<br>TTGCTCACCATAACGCATGCTTTAGGTCCAGG<br>GTTCTCC-3'                     | Thermo Fisher                       | n/a |

1244

1245

1246 Table S3. Recombinant DNA constructed in this study

|                                              |                                   |            |
|----------------------------------------------|-----------------------------------|------------|
| pGEM-T Easy                                  | Promega                           | Cat# A1360 |
| pCAG-H2B-eGFP                                | Dr. Hadjantonakis<br>(MSKCC, NY). |            |
| pCAG-N-Cad-M-2A-H2B-<br>mCherry              | This study                        |            |
| pCAG-N-Cad-M-2A-eGFP-<br>CAAX-2A-H2B-mCherry | This study                        |            |

1247

1248

1249

1250 Table S4. Antibodies and chemicals used in this study

| Antibodies                                                                                                       | Source                  | IDENTIFIER                        |
|------------------------------------------------------------------------------------------------------------------|-------------------------|-----------------------------------|
| Purified Mouse Anti-E-Cadherin<br>1:1000 dilution                                                                | BD transduction<br>Lab  | Cat# 610181; RRID:<br>AB_397580   |
| Anti-N-cadherin, polyclonal<br>1:300 dilution                                                                    | Takara bio              | Cat# M142; RRID: AB_444317        |
| Monoclonal Anti-N-Cadherin/A-41CAM (Clone GC-4)<br>1:50 dilution                                                 | Sigma-Aldrich           | Cat# C2542; RRID: AB_258801       |
| Goat anti-Mouse IgG, (H+L)<br>Highly Cross-adsorbed<br>Antibody, Alexa Fluor 488<br>1:300 dilution               | Thermo Fisher           | Cat# A-11029; RRID:<br>AB_138404  |
| Goat anti-Rabbit IgG, (H+L)<br>Highly Cross-Adsorbed<br>Secondary Antibody, Alexa<br>Fluor 488<br>1:300 dilution | Thermo Fisher           | Cat# A-11034 ;<br>RRID:AB_2576217 |
| Cellstain DAPI Solution<br>1:100 dilution                                                                        | Dojindo<br>Laboratories | Cat# D523                         |

1251

1252 Table S5. Software and Algorithms used in this study.

|                                                          |                              |                                                                                        |
|----------------------------------------------------------|------------------------------|----------------------------------------------------------------------------------------|
| Fiji                                                     | NIH                          | <a href="https://fiji.sc">https://fiji.sc</a>                                          |
| Imaris x64 9.5.1                                         | Oxford Instruments           | <a href="https://imaris.oxinst.com/">https://imaris.oxinst.com/</a><br>RRID:SCR_007370 |
| HomCloud                                                 | HomCloud<br>Development team | <a href="https://homcloud.dev/index.en.html">https://homcloud.dev/index.en.html</a>    |
| Custom MATLAB<br>code for analyzing<br>cell trajectories | This study                   | N/A                                                                                    |

|                                          |            |                                                           |
|------------------------------------------|------------|-----------------------------------------------------------|
| Custom C++ code for numerical simulation | This study | N/A                                                       |
| Ovito Pro                                |            | <a href="https://www.ovito.org">https://www.ovito.org</a> |

1253

1254

1255 Table S6. The parameters used in the numerical simulation.

| <i>variables</i>                          | <i>symbols</i>   | <i>values</i>    |
|-------------------------------------------|------------------|------------------|
| <i>Cell diameter</i>                      | $d$              | 1                |
| <i>Cell head and tail length</i>          | $\ell_c$         | $d(\alpha - 1)$  |
| <i>Cell stretching elasticity</i>         | $\kappa^{str}$   | 10               |
| <i>Cell-cell attraction strength</i>      | $\epsilon^{atr}$ | 0.01             |
| <i>Cell-cell repulsion strength</i>       | $\epsilon^{rep}$ | 0.1              |
| <i>Cell-cell interaction length</i>       | $\sigma^{cc}$    | $d$              |
| <i>Width of cell-cell attraction well</i> | $\xi^{cc}$       | $d/2$            |
| <i>Effective viscosity</i>                | $\eta$           | 0.1              |
| <i>Temperature</i>                        | $k_B T$          | 0.004142         |
| <i>Noise strength</i>                     | $\sigma$         | $2 k_B T \gamma$ |
| <i>Number of cells</i>                    | $N_{cell}$       | 1600             |

1256

1257

1258 Table S7. The parameters used in the numerical simulation with the agent supply.

| <i>variables</i>                      | <i>symbols</i>   | <i>values</i> |
|---------------------------------------|------------------|---------------|
| <i>Self-propulsion force</i>          | $f^{act}$        | 0.01          |
| <i>Repulsive strength from source</i> | $k^{source}$     | 0.1           |
| <i>Chemotactic force</i>              | $f^{chamotaxis}$ | 0.004         |
| <i>Simulation box size in x</i>       | $L_x$            | 60            |
| <i>Simulation box size in y</i>       | $L_y$            | 40            |

1259

1260

1261

1262

Figure 1

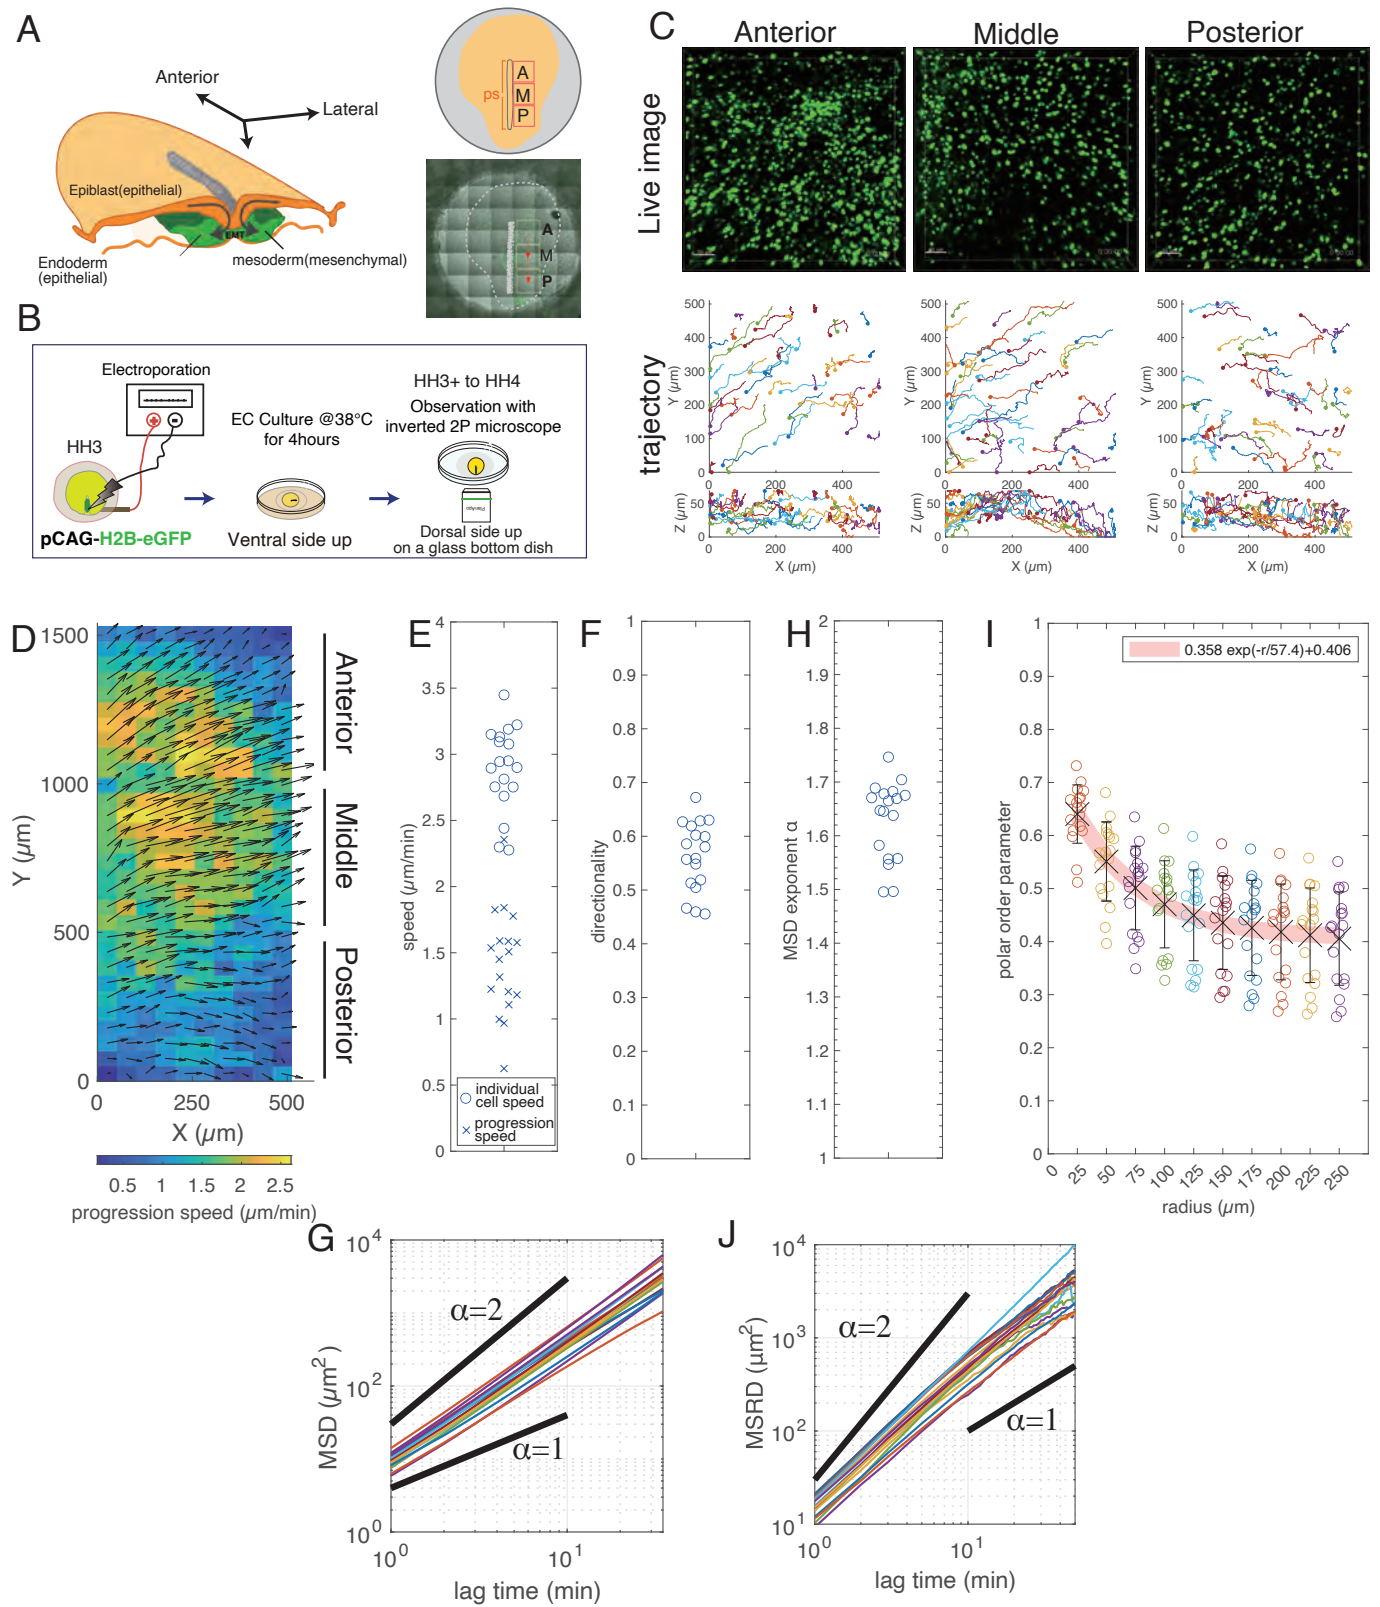





Figure 3

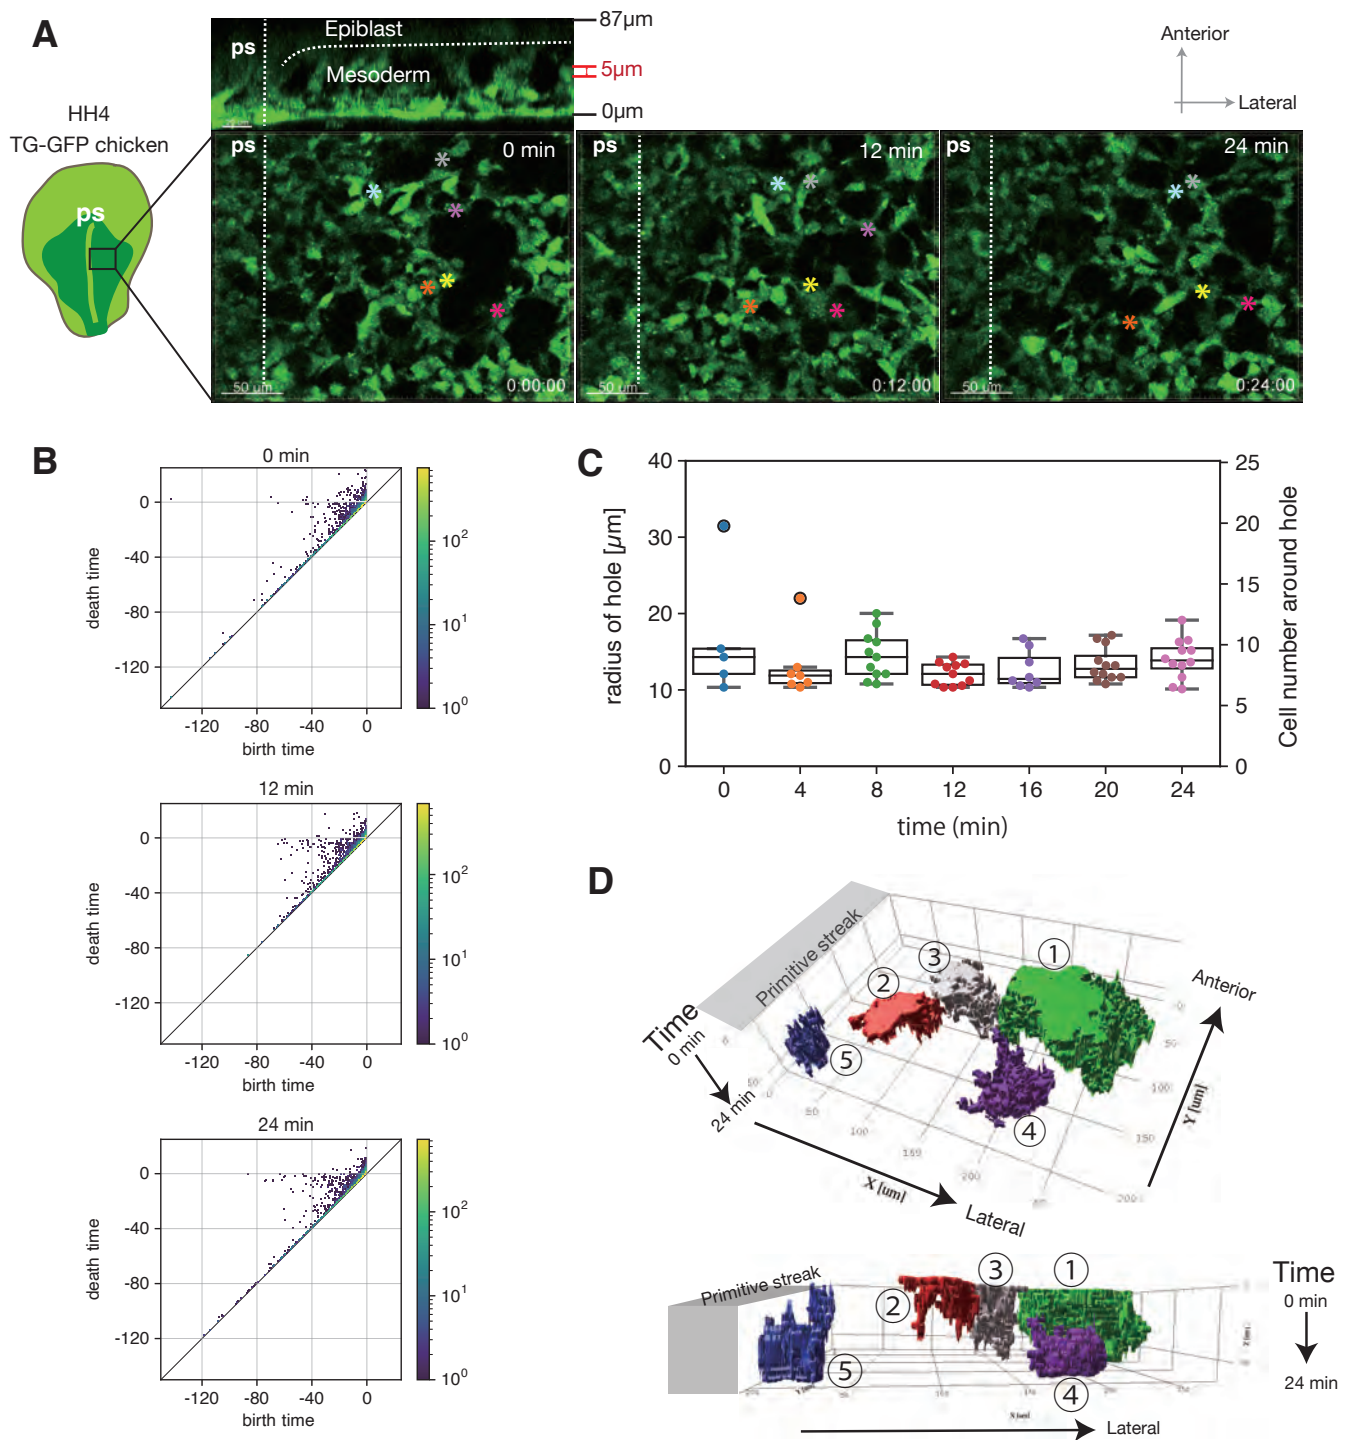

Figure 4

A

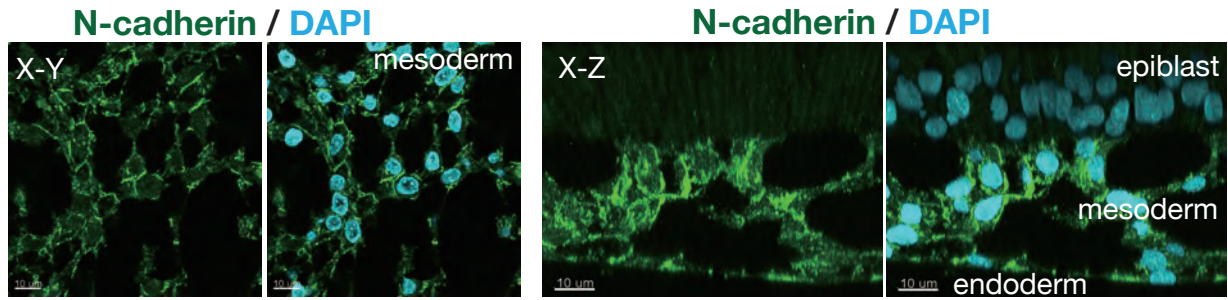

B

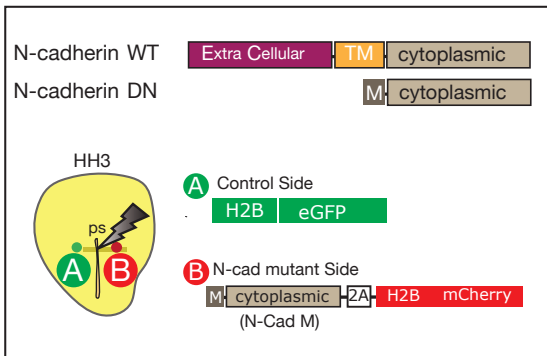

C

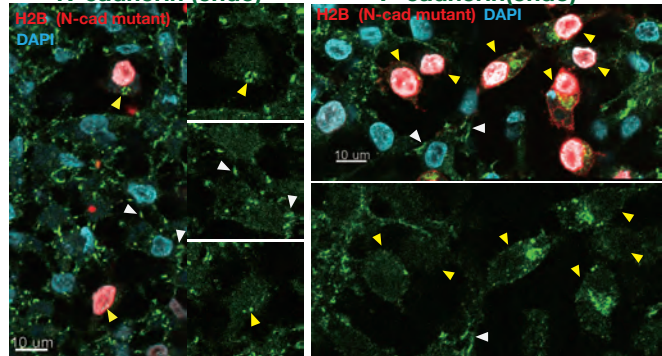

D

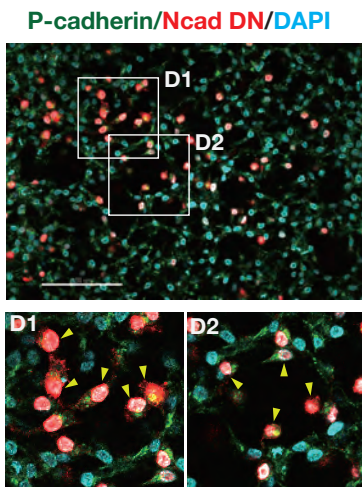

E

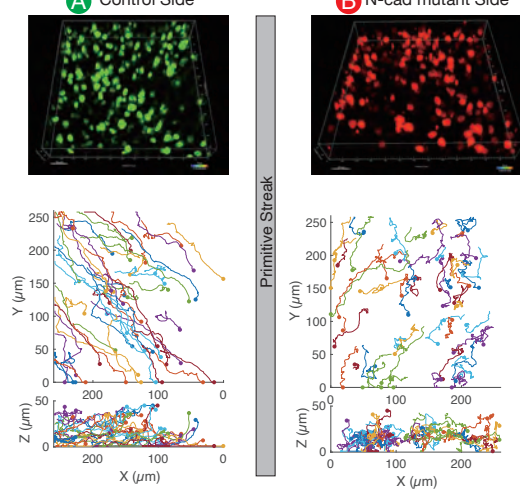

F

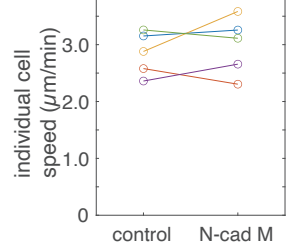

G

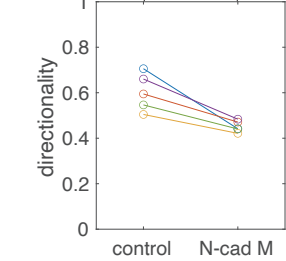

H

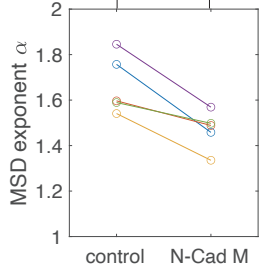

I

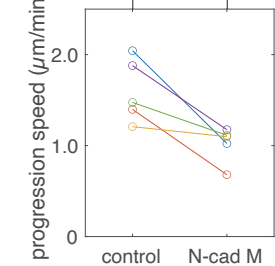

J

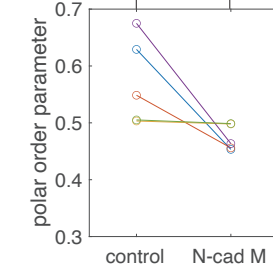

K

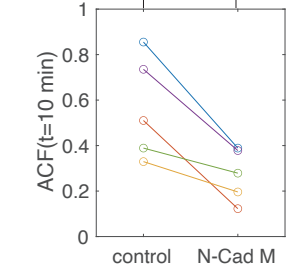



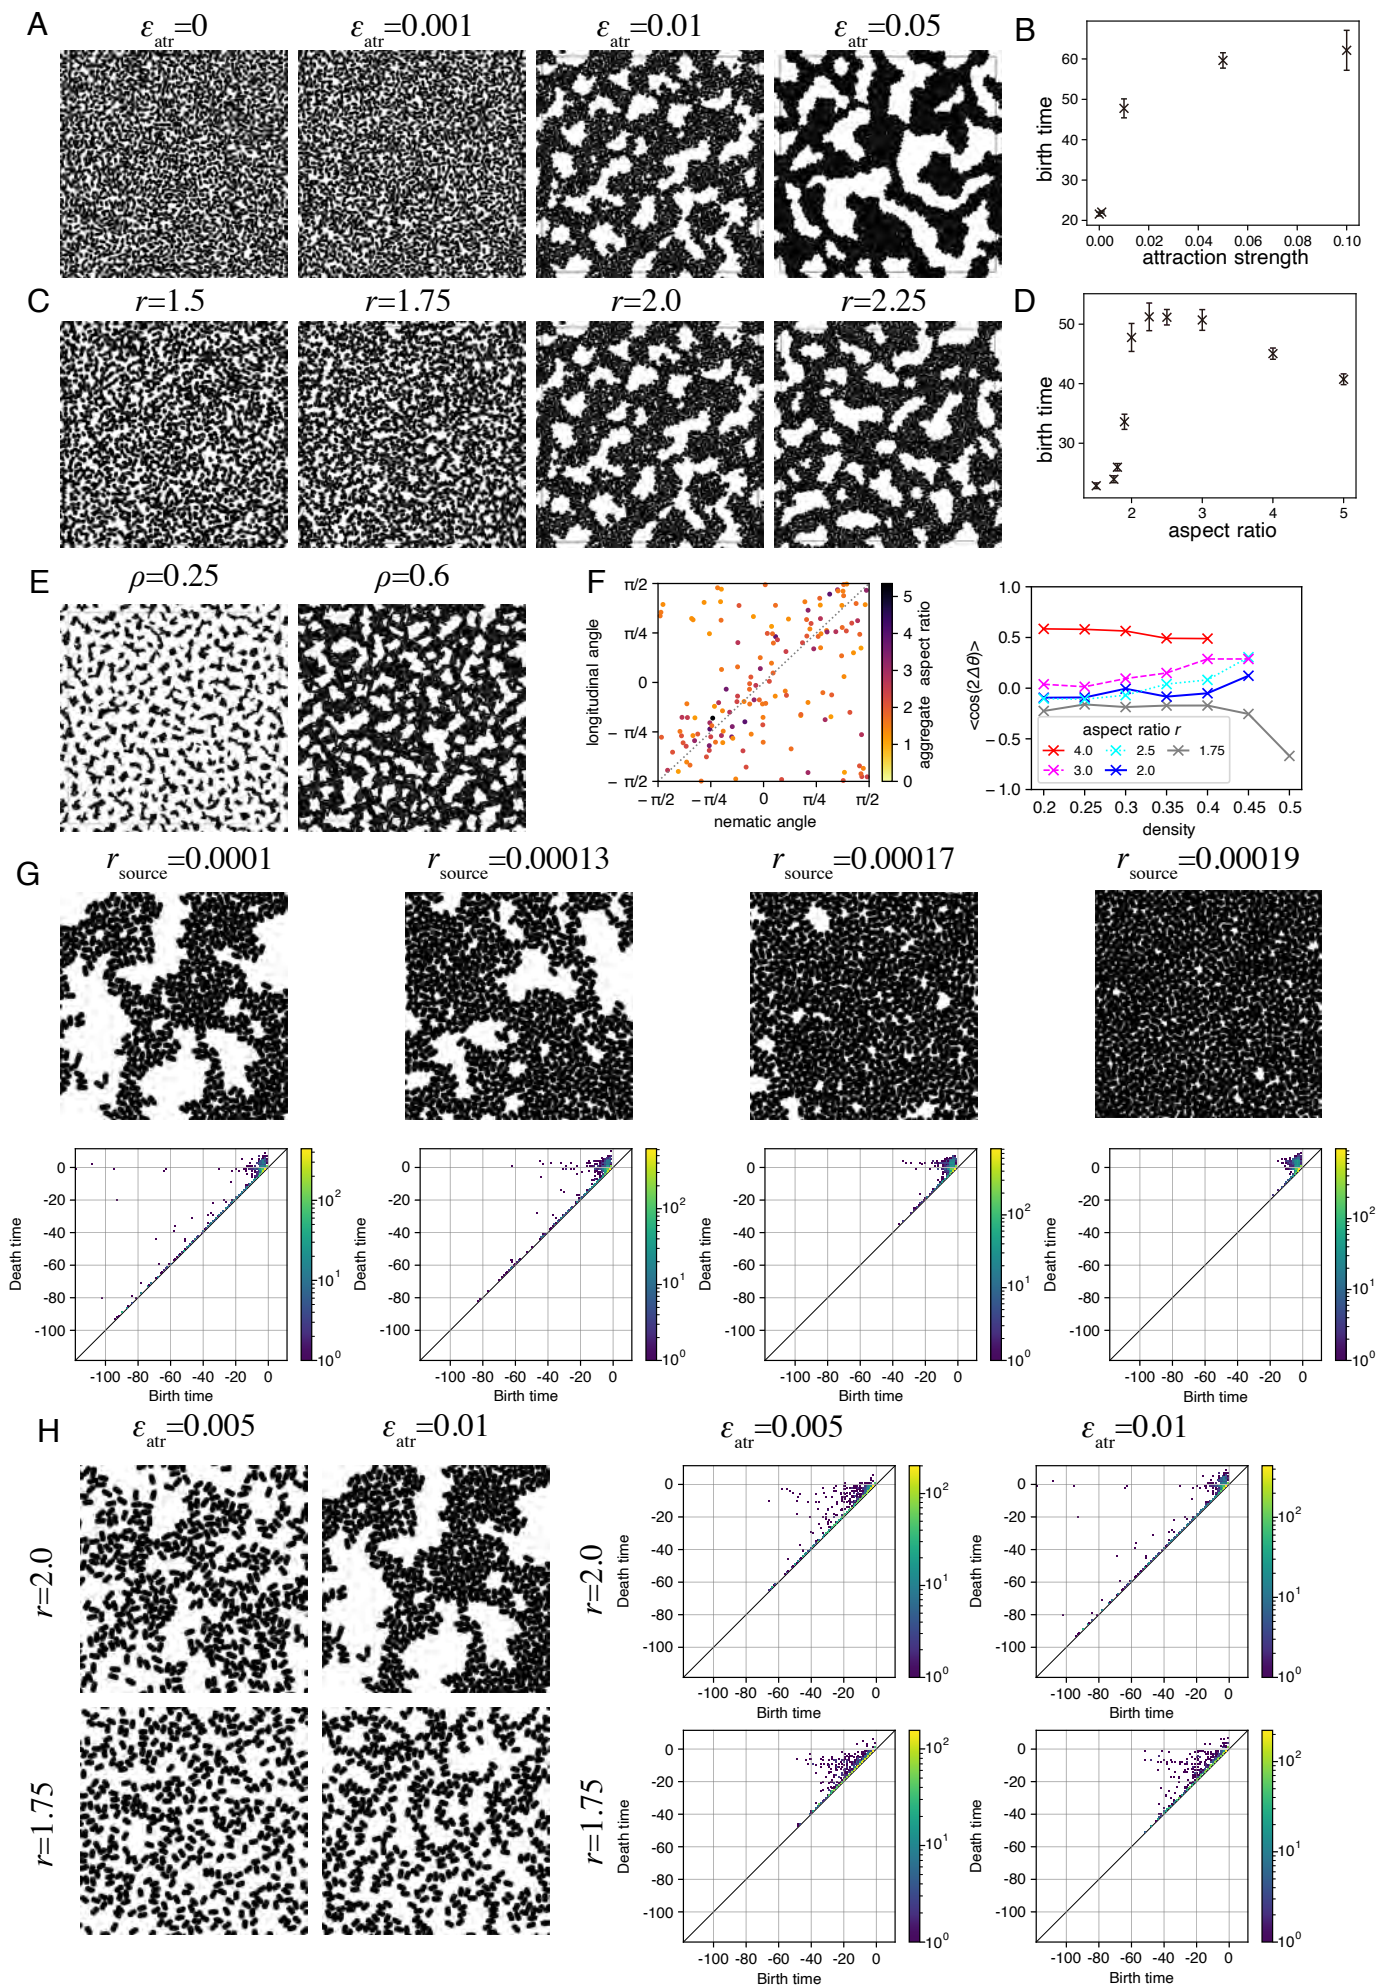

Figure 5

Figure 6

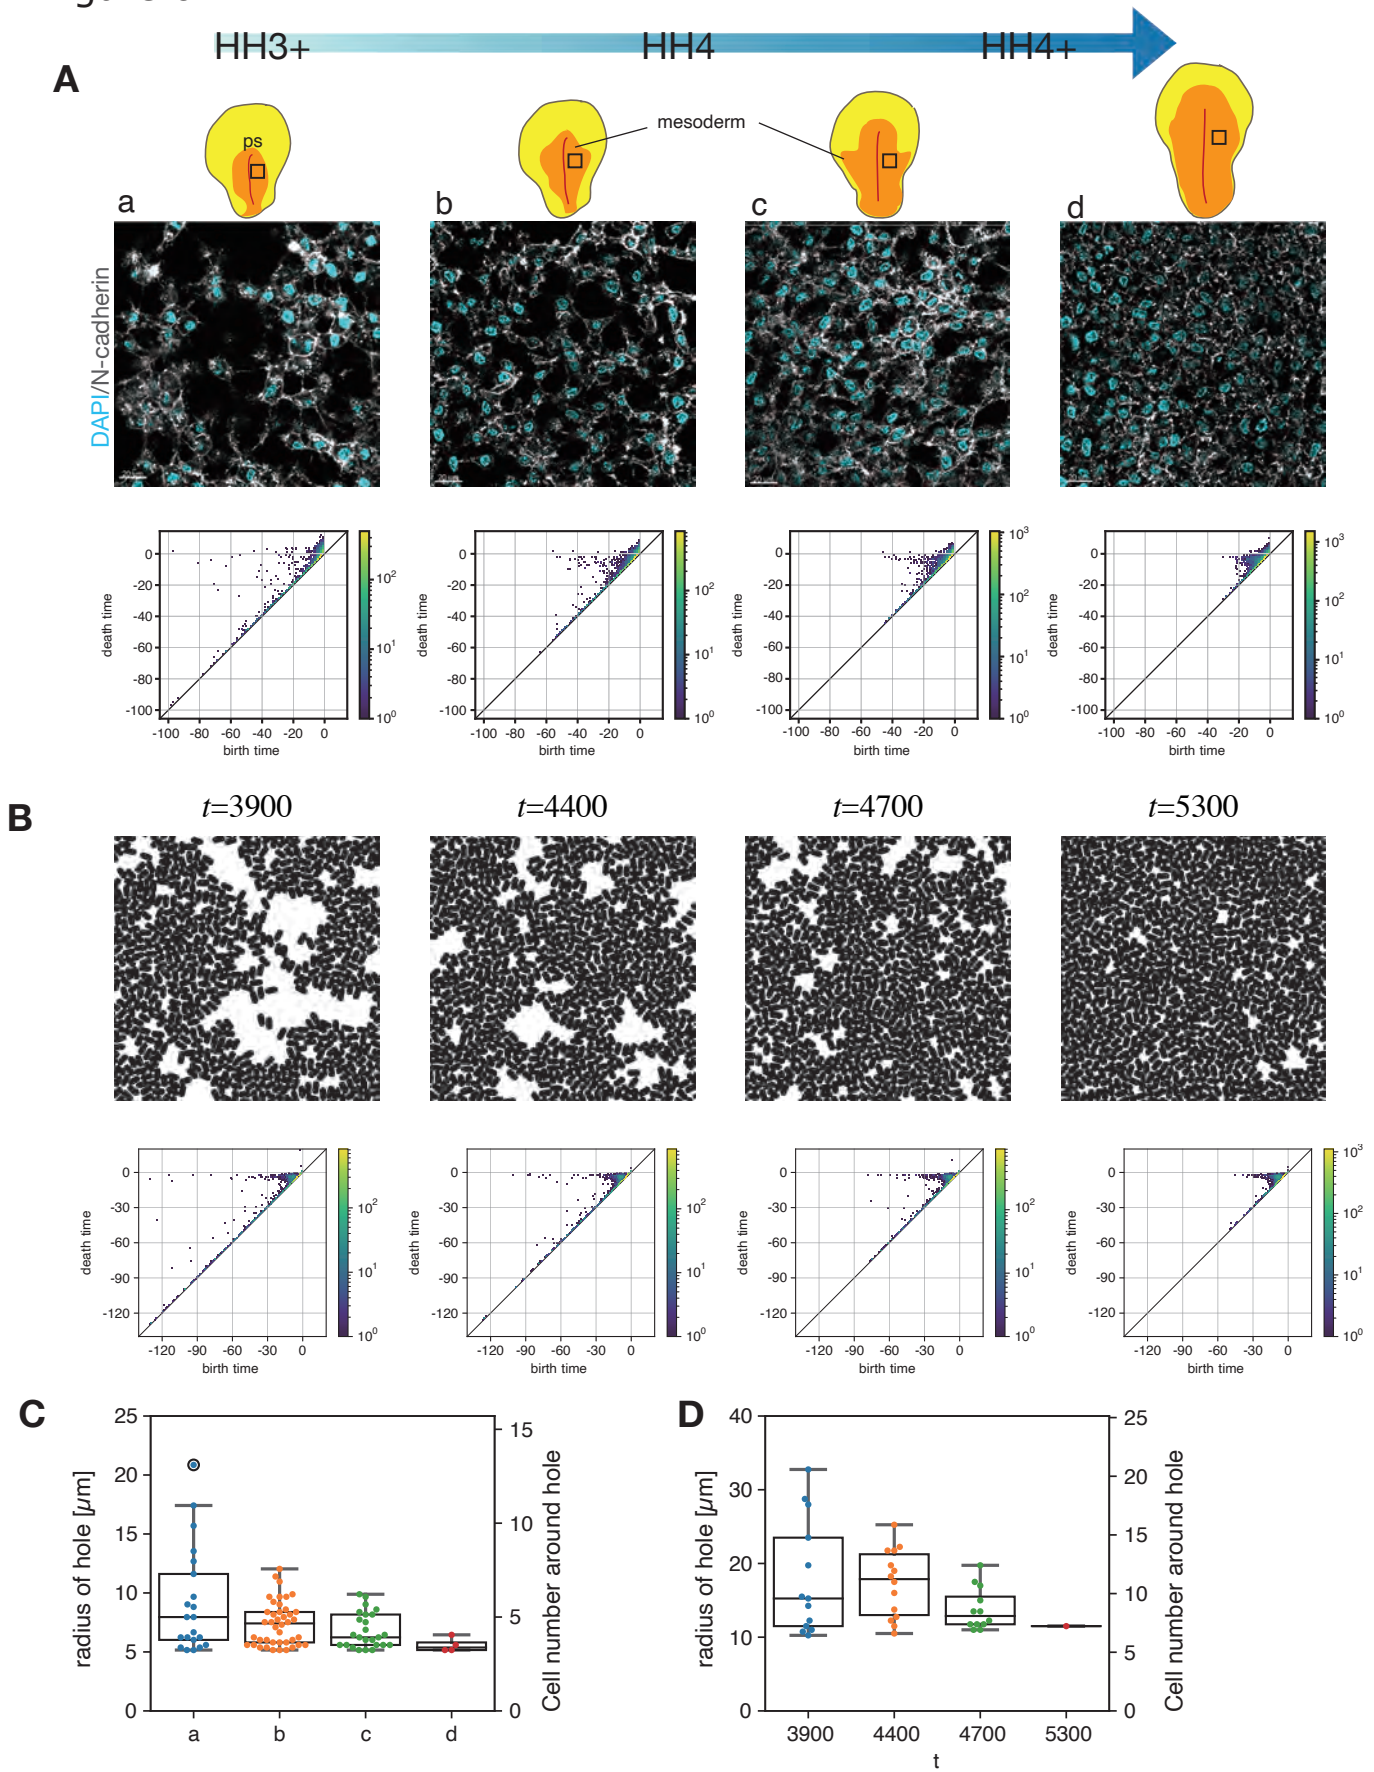

Source: https://www.biorxiv.org/content/10.1101/2022.09.08.507227v1.full.pdf
